# Supplementary material for: Recent Observations on Deep-Rooted Polymorphism Patterns of Language/Cognition Genes
Source: Research Square preprint supplement (doi:10.21203/rs.3.rs-6910300/v1), 2025-09-26
Supplement: Supplementary file 1 [file 6946efd3a0f7d85dc5db4fce.xlsx]

## Sheet: Sheet1
sample	taxon
et1	human
ga1	human
ga2	human
ga3	human
ga4	human
ga5	human
ga6	human
ke1	human
mo1l	human
mo1s	human
sa1	human
sa2	human
sa3	human
ss2	human
ss3	human
mt1	human
sm5	human
sd1	human
af1	human
af2	human
sw1	human
vs1	human
cy1	human
cy2	human
cy3	human
cy4	human
cy5	human
cy6	human
gu1	human
gu2	human
gu3	human
yo1	human
yo3	human
yo4	human
nt1	human
nt2	human
nt3	human
nt4	human
nt5	human
mo2	human
mo3	human
mo4	human
lb1	human
mb1	human
c4	human
c5	human
c6	human
c7	human
c8	human
c9	human
c11	human
c12	human
c13	human
c14	human
c15	human
c16	human
c17	human
c18	human
c19	human
c20	human
c21	human
c22	human
c23	human
c24	human
c25	human
c26	human
c27	human
dc1	human
dc2	human
dc3	human
dg1	human
dg2	human
in4	human
in5	human
in7	human
in8	human
in9	human
mg1	human
ne10m	human
ne2	human
ne3	human
ne5	human
ne9m	human
ja1	human
ja2	human
jm1	human
jm2	human
pa4	human
pa5	human
pa6	human
sr1	human
sr2	human
sr3	human
kz1	human
kz2	human
kz3	human
cz1	human
de2	human
de3	human
de4	human
de5	human
dep	human
fi1	human
fi2	human
fi3	human
ge1	human
ge1n	human
z1	human
z2	human
z3	human
z4	human
z5	human
z6	human
la1	human
nd1	human
nd1n	human
nd10	human
nd11	human
nd2	human
nd3	human
nd4n	human
nd5n	human
nd6	human
nd7	human
nd8	human
nd9	human
sp1	human
sp2	human
sp3	human
sp4n	human
sp5	human
sp6	human
M10	Cetacea
M12	Pinnipedia
M13	Pinnipedia
M14	Cetacea
M15	Pinnipedia
M16	Cetacea
M17	Pinnipedia
M1	Pinnipedia
M2	Cetacea
M3	Cetacea
M4	Cetacea
M5	Cetacea
M6	Cetacea
M7	Cetacea
M8	Cetacea
M9	Cetacea
km1	human
sc1	human
us1	human
us2	human
so3	human
so4	human
so4n	human
so5	human
P1	Primates
P10	Primates
P11	Primates
P12	Primates
P13	Primates
P14	Primates
P15	Primates
P16	Primates
P17	Primates
P18	Primates
P19	Primates
P2	Primates
P20	Primates
P21	Primates
P22	Primates
P23	Primates
P24	Primates
P25	Primates
P26	Primates
P27	Primates
P28	Primates
P29	Primates
P3	Primates
P30	Primates
P31	Primates
P32	Primates
P33	Primates
P4	Primates
P5	Primates
pp6	Primates
P7	Primates
P8	Primates
P9	Primates
bz1	human
ch1	human
me1	human
ur1	human
ur2	human
pe1	human
pe2	human
pe3	human
so1	human
so2	human
so6	human
so7	human
so8	human
so9	human
Br1	human
my3	human
my6	human
my7	human
ap1	Artiodactyla
cm1	Artiodactyla
cm2	Artiodactyla
dp1	Cetacea
dp2	Cetacea
dp3n	Cetacea
gb1	Primates
ha1	human
hu1	Cetacea
pr1	birds
rr1	Primates
rr2	Primates
rt1	Artiodactyla
rt2	Artiodactyla
rt3	Artiodactyla
su1	Artiodactyla
b10	birds
b11	birds
b12	birds
b13	birds
b14	birds
b15	birds
b16	birds
b17	birds
b18	birds
b19	birds
b1	birds
b20	birds
b21	birds
b22	birds
b23	birds
b24	birds
b25	birds
b26	birds
b27	birds
b28	birds
b29	birds
b2	birds
b30	birds
b31	birds
b32	birds
b33	birds
b34	birds
b35	birds
b36	birds
b37	birds
b38	birds
b39	birds
b3	birds
b40	birds
b42	birds
b43	birds
b44	birds
b45	birds
b46	birds
b47	birds
b48	birds
b49	birds
b4	birds
b50	birds
b5	birds
b6	birds
b7	birds
b8	birds
b9	birds
d10	rodents
d11	rodents
d12	rodents
d13	rodents
d14	rodents
d15	rodents
d16	rodents
d17	rodents
d18	rodents
d19	rodents
d1	rodents
d20	rodents
d21	rodents
d22	rodents
d23	rodents
d24	rodents
d25	rodents
d26	rodents
d27	rodents
d28	rodents
d29	rodents
d2	rodents
d3	rodents
d4	rodents
d5	rodents
d6	rodents
d7	rodents
d8	rodents
d9	rodents
F10	fish
F11	fish
F12	fish
F13	fish
F14	fish
F15	fish
F16	fish
F17	fish
F18	fish
F19	fish
F1	fish
F20	fish
F21	fish
F22	fish
F23	fish
F24	fish
F25	fish
F26	fish
F27	fish
F28	fish
F29	fish
F2	fish
F30	fish
F31	fish
F32	fish
F33	fish
F34	fish
F35	fish
F36	fish
F37	fish
F38	fish
F39	fish
F3	fish
F40	fish
F41	fish
F42	fish
F43	fish
F44	fish
F45	fish
F46	fish
F47	fish
F48	fish
F49	fish
F4	fish
F50	fish
F51	fish
F52	fish
F53	fish
F54	fish
F55	fish
F56	fish
F57	fish
F58	fish
F5	fish
F6	fish
F7	fish
F8	fish
F9	fish
F59	fish
F60	fish
F61	fish
F62	fish
F63	fish
F64	fish
F65	fish
F66	fish
F67	fish
F68	fish
F69	fish
F70	fish
F71	fish
F72	fish
F73	fish
F74	fish
F75	fish
F76	fish
F77	fish
F78	fish
F79	fish
F80	fish
lc1	fish
lc5	fish
lm1	fish
lu1	fish
lu3	fish
lu4	fish
st1	fish
L10	Laurasiatherians
L11	Laurasiatherians
L12	Laurasiatherians
L13	Laurasiatherians
L14	Laurasiatherians
L15	Laurasiatherians
L16	Laurasiatherians
L17	Laurasiatherians
L18	Laurasiatherians
L19	Laurasiatherians
L1	Laurasiatherians
L20	Laurasiatherians
L21	Laurasiatherians
L2	Laurasiatherians
L3	Laurasiatherians
L4	Laurasiatherians
L5	Laurasiatherians
L6	Laurasiatherians
L7	Laurasiatherians
L8	Laurasiatherians
L9	Laurasiatherians
L22	Laurasiatherians
L23	Laurasiatherians
L24	Laurasiatherians
L25	Laurasiatherians
L26	Laurasiatherians
L27	Laurasiatherians
L28	Laurasiatherians
L29	Laurasiatherians
L30	Laurasiatherians
L31	Laurasiatherians
L32	Laurasiatherians
L33	Laurasiatherians
L34	Laurasiatherians
L35	Laurasiatherians
L36	Laurasiatherians
L37	Laurasiatherians
L38	Laurasiatherians
L39	Laurasiatherians
L40	Laurasiatherians
L41	Laurasiatherians
L42	Laurasiatherians
R10	Reptile
R11	Reptile
R12	Reptile
R13	Reptile
R14	Reptile
R15	Reptile
R16	Reptile
R17	Reptile
R18	Reptile
R19	Reptile
R1	Reptile
R2	Reptile
R3	Reptile
R4	Reptile
R5	Reptile
R6	Reptile
R7	Reptile
R8	Reptile
R9	Reptile
x10	other
x11	other
x12	other
x13	other
x14	other
x15	other
x16	other
x17	other
x18	other
x19	other
x1	other
x20	other
x21	other
x22	other
x2	other
x3	other
x4	other
x5	other
x6	other
x7	other
x8	other
x9	other
