# Supplementary material for: Recent Observations on Deep-Rooted Polymorphism Patterns of Language/Cognition Genes
Source: Research Square preprint supplement (doi:10.21203/rs.3.rs-6910300/v1), 2025-09-26
Supplement: Supplementary file 2 [file 7ff94a69b5c7647517314660.xlsx]

## Sheet: Sheet1
	Table 1s 471 genomes employed in this study
Sample	Region-1	Region-2	Age (BP)	Details	Genome size (G)	Accession
c4	China	Asia		Hezhen	81	PRJEB36297
c5	China	Asia		OROQEN	32	PRJEB36297
c6	China	Asia		Yi	9	PRJEB36297
c7	China (a)	Asia	7000	WQM4 in ancient China	27	PRJEB36297
c8	China (a)	Asia	7000	ZLNR-2 in ancient China	17	PRJEB36297
c9	China (a)	Asia	6175-5937	XW-M1R18 in ancient China	117	PRJEB36297
c11	China (a)	Asia	4089-3983	China (WD-WT1H16)	84	PRJEB36297
c12	China (a)	Asia	4151-3974	China (PLTM311)	87	PRJEB36297
c13	China (a)	Asia	2200-2000	China (LGM41)	82	PRJEB36297
c14	China (a)	Asia	2338-2180	China (LGM79)	101	PRJEB36297
c15	China (a)	Asia	3181-3073	China (JXNTM23)	77	PRJEB36297
c16	China (a)	Asia	3800-4000	China (LJM14)	61	PRJEB36297
c17	China (a)	Asia	4143-3985	China (SM-SGDLM6)	81	PRJEB36297
c18	China (a)	Asia	4225-3995	China (PLTM310 )	73	PRJEB36297
c19	China (a)	Asia	5304-5056	China (WGM35 )	83	PRJEB36297
c20	China (a)	Asia	40000	Tianyuan	1.7	PRJEB20217
c21	China (a)	Asia	4079-3913	China (LJM3)	140	PRJEB36297
c22	China (a)	Asia	4000	China ( SM-SGDLM27)	222	PRJEB36297
c23	China (a)	Asia	5300	China (BLSM27S)	67	PRJEB36297
c24	China (a)	Asia	3700	China (WD-WT5M2)	41	PRJEB36297
c25	China (a)	Asia	5500	China WGM70	51	PRJEB36297
c26	China (a)	Asia	5500	China PLT-M312	32	PRJEB36297
c27	China (a)	Asia	2300	Ancient genomes China HJTM115	61	PRJEB36297
dc1	China	Asia		DaiChina-2	42	SRX5983023
dc2	China	Asia		DaiChina-1 HG00766	87	SRX5983023
dc3	China	Asia		DaiChina-3	72	SRX5983023
dg1	China/Russia (a)	Asia	7700	DevilsGate	22	PRJEB14817
dg2	China/Russia (a)	Asia	7700	DevilsGate	18	PRJEB14817
in4	India	Asia		Sample Bir18	112	PRJEB16019
in5	India	Asia		Sample Ria23	73	PRJEB16019
in7	India	Asia		Sample 24191	125	PRJEB5737
in8	India	Asia		Sample 10547	115	PRJEB5737
in9	India	Asia		Sample 19224	102	PRJEB5737
mg1	Mongolia (a)	Asia	34000	hominin skull cap Salkhit Valley	8	PRJEB37670
ne10m	Nepal (a)	Asia	~2000	Mebrak-mix3	54	PRJEB41752
ne2	Nepal (a)	Asia	~2000	Kyang-KS25	34	PRJEB41752
ne3	Nepal (a)	Asia	~2000	Kyang-KS20	31	PRJEB41752
ne5	Nepal (a)	Asia	~2000	Samdzong S143	45	PRJEB41752
ne9m	Nepal (a)	Asia	~2000	Mebrak-mix2	58	PRJEB41752
Ja1	Japan (a)	Asia	3500	Funadomari23 female-1	139	PRJDB7235
ja2	Japan (a)	Asia	3500	Funadomari23 female-2	34	PRJDB7235
jm1	Japan (a)	Asia	3000	Jomons Sanganji_131421-3_A1	65	PRJDB4223
jm2	Japan (a)	Asia	3000	Jomons Sanganji_131421-3_A2	82	PRJDB4223
pa4	Pakistan	Asia		Pakistan Kalash+Burusho+Hazara	63	PRJEB9586
pa5	Pakistan	Asia		Pakistan Makrani +Pathan	91	PRJEB9586
pa6	Pakistan	Asia		Pakistan not used in Brahui	113	PRJEB9586
sr1	Sri Lanka	Asia		SriLankan No.1	102	PRJNA552609
sr2	Sri Lanka	Asia		SriLankan No.2	101	PRJNA552609
sr3	Sri Lanka	Asia		Sri Lankan Tamil	103	PRJNA552609
kz1	Poland(a)	Europe	4500	RISE1160	61	PRJEB61632
kz2	Poland(a)	Europe	4500	RISE1159	260	PRJEB61632
kz3	Poland(a)	Europe	4500	RISE1168	178	PRJEB61632
cz1	Czech (a)	Europe	45000	Czechia ancient	112	PRJEB39040
de2	Russia (a)	Europe	100000	Denisova2	109	PRJEB20653
de3	Russia (a)	Europe	74000-82000	new version of DenisovaPha	67	PRJEB3092
de4	Russia (a)	Europe	100000	new version of Denisova2	74	PRJEB20653
de5	Russia (a)	Europe	74000-82000	DenisovaPha	80	PRJEB3092
dep	Russia (a)	Europe	74000-82000	DenisovaPha	95	PRJEB3092
fi1	Finnish	Europe		Finnish mix-1	119	PRJNA38449
fi2	Finnish	Europe		Finnish mix-2	61	PRJNA38449
fi3	Finnish	Europe		Finnish mix-3	62	PRJNA38449
ge1	Georgia (a)	Europe	9529–9895	Georgia kk1	14	PRJNA670050
ge1n	Georgia (a)	Europe	9712	Georgia kk1 revised	115	PRJNA670050
z1	Latvia(a)	Europe	7689	ZVEJ25	166	PRJNA670050
z2	Latvia(a)	Europe	5965	ZVEJ31	96	PRJNA670050
z3	Hungary(a)	Europe	7050	NE5	146	PRJNA670050
z4	Georgia(a)	Europe	13300	Satsurblia	110	PRJEB11364
z5	Georgia(a)	Europe	9700	Kotias	77	PRJEB11364
z6	Switzerland(a)	Europe	13700	Bichon	114	PRJEB11364
la1	Latvia (a)	Europe	6179-5750	ZVEJ31 Latvia	13	PRJNA670050
nd1	Russia (a)	Europe	50000	Neandertal-MIX1	64	PRJEB29475
nd1n	Russia (a)	Europe	44000	Okladnikov11 in Okladnikov Cave	55	PRJEB55327
nd10	Spain (a)	Europe	430000	Sima de los Huesos	0.2	PRJEB10597
nd11	France(a)	Europe	50000	Thorin from Grotte Mandrin in Mediterranean France	18	PRJEB73284
nd2	Spain (a)	Europe	60,000-120,000	Neanderthal ForbesQuarry	143	PRJEB31410
nd3	Spain (a)	Europe	60,000-120,000	Neanderthal Devils Tower	6	PRJEB31410
nd4n	Russia (a)	Europe	50300	Neanderthal Altai	158	PRJEB1265
nd5n	Russia (a)	Europe	60000	Neandertal Mezmaiskaya	5.4	PRJEB1757
nd6	Belgium(a)	Europe	120000	Neandertals Scladina Cave in Belgium	36	PRJEB29475
nd7	Germany(a)	Europe	120000	Neandertals Hohlenstein-Stadel Cave	27	PRJEB29475
nd8	Russia (a)	Europe	60000	Neandertal Mezmaiskaya-2	20	PRJEB21881
nd9	Russia (a)	Europe	50000	Neandertal-MIX2	74	PRJEB29475
sp1	Spain	Europe		SPAIN1	200	PRJNA42557
sp2	Spain	Europe		SPAIN2	32	PRJNA42557
sp3	Spain	Europe		Spain3	98	PRJNA42557
sp4n	Spain	Europe		Spain4n	67	PRJNA42557
sp5	Spain	Europe		SPAIN MIX	79	PRJNA42557
sp6	Spain(a)	Europe	23000	23000yr Spain ancient	8.3	PRJEB58642
et1	Ethiopia(a)	Africa	4500	Ancient Ethiopian 'Mota' genome	31	PRJNA295861
ga1	Gambia	Africa		Gambian1	125	PRJEB31736
ga2	Gambia	Africa		Gambian2	124	PRJEB31736
ga3	Gambia	Africa		Gambian3	19	PRJEB31736
ga4	Gambia	Africa		Gambian4	18	PRJEB31736
ga5	Gambia	Africa		Gambian5	42	PRJEB31736
ga6	Gambia	Africa		Gambian6	66	PRJEB31736
ke1	Kenya	Africa		LuhyaKenya-mix1	104	PRJEB31736
mo1l	Morocco(a)	Africa	15000	Ancient Morocco genome	18	PRJNA422662
mo1s	Morocco(a)	Africa	15000	Ancient Morocco genome	6	PRJNA422662
sa1	Southern Africa	Africa		Southern Africa KB1	26	PRJNA46161
sa2	Southern Africa	Africa		Southern Africa NB1	16	PRJNA46161
sa3	Southhern Africa	Africa		Southern Africa combined three individuals	10	PRJNA46161
ss2	sub-Sahara(a)	Africa	7900	African foragers I10871_new	42	PRJEB49291
ss3	sub-Sahara (a)	Africa	3160	African foragers I10873_new+I10874_new	25	PRJEB49291
mt1	Ethiopia(a)	Africa	4300	Mota	105	PRJNA295861
sm5	Cameroon(a)	Africa	3100	Shum Laka (Cameroon)	117	PRJEB49291
sd1	Sudan(a)	Africa	4000	mummified hair sample	21	PRJEB53198
af1	Morocco(a)	Africa	5000	ktg004	108	PRJEB59008
af2	Morocco(a)	Africa	5000	skh001	124	PRJEB59008
sw1	Kenya(a)	Africa	1300-1800	Swahili coast of eastern Africa	40	PRJEB58698
vs1	South Africa(a)	Africa	200	Vaalkrans man,Cape Floristic Region	24	PRJEB40005
cy1	Morocco(a)	Africa	300-900	Canary Islands EI Teide National Park	58	PRJEB61655
cy2	Morocco(a)	Africa	1024 – 1155	Canary Islands EI Teide National Park	45	PRJEB61655
cy3	Morocco(a)	Africa	2000	Canary Islands Gran Canaria	32	PRJEB61655
cy4	Morocco(a)	Africa	1200	Canary Islands Fuerteventura	35	PRJEB61655
cy5	Morocco(a)	Africa	1400-1450	Canary Islands El Teide National Park	31	PRJEB61655
cy6	Morocco(a)	Africa	1313-1424	Canary Islands El Agujero	30	PRJEB61655
gu1	Guinea	Africa		Bioko from the Gulf of Guinea	142	PRJEB26599
gu2	Guinea	Africa		Bioko from the Gulf of Guinea	145	PRJEB26599
gu3	Guinea	Africa		Bioko from the Gulf of Guinea	155	PRJEB26599
yo1	Nigeria	Africa		SAMN00001627 Yoruba	62	PRJNA33865
yo3	Nigeria	Africa		SAMN00001673 Yoruba	57	PRJNA33865
yo4	Nigeria	Africa		SAMN00000559 Yoruba	56	PRJNA33865
nt1	South Africa(a)	Africa	500-2000	KwaZulu-Natal ela001-dr	115	PRJEB22660
nt2	South Africa(a)	Africa	500-2000	new001-dr	124	PRJEB22660
nt3	South Africa(a)	Africa	500-2000	ela001	45	PRJEB22660
nt4	South Africa(a)	Africa	500-2000	baa001-dr	148	PRJEB22660
nt5	South Africa(a)	Africa	500-2000	mfo001-dr	71	PRJEB22660
mo2	Morocco(a)	Africa	15000	Iberomaurusian	18	PRJNA422662
mo3	Morocco	Africa		MORBER2_1	67	PRJNA660888
mo4	Morocco	Africa		MORBER1_1	65	PRJNA660888
mb1	Congo	Africa		Mbuti Pygmy	0.6	SRR185844
lb1	Lebanon (a)	Africa	Bronze Age	lb1 lbancient6404156 Sidon	90	PRJEB21330
km1	US(a)	NAmerica	9000	Kennewick Man Washington	79	SRS937952
sc1	US(a)	NAmerica	10000	US Spirit Cave	10	PRJEB29074
us1	US(a)	NAmerica	2000	US Lovelock 1-4 2000BP	65	PRJEB29074
us2	US(a)	NAmerica	12500	US ancient Anzick	25	PRJEB29074
so3	US(a)	NAmerica	1900	lovelock2	141	PRJEB29074
so4	US(a)	NAmerica	700	lovelock3	173	PRJEB29074
so4n	US(a)	NAmerica	700	lovelock3 revised	173	PRJEB29074
so5	US(a)	NAmerica	10000	SpiritCave	184	PRJEB29074
bz1	Brazil (a)	SAmerica	8000	Sumidouro Cave, Lagoa Santa Brazil	41	PRJEB29074
ch1	Chile(a)	SAmerica	4700	Ayayema	35	PRJEB29074
me1	Mexica	SAmerica		Mexican LosAngeL-1	103	PRJEB31736
ur1	Uruguay(a)	SAmerica	668	Uruguay (CH13)	19	PRJEB48360
ur2	Uruguay(a)	SAmerica	1400	Uruguay (CH198)	12	PRJEB48360
pe1	Peru	SAmerica		PERU ERR042535-MIX1	67	PRJEB31736
pe2	Peru	SAmerica		PERU-ERR042532_FINAL	27	PRJEB31736
pe3	Peru	SAmerica		peru--ERR042533_FINAL	28	PRJEB31736
so1	Brazil(a)	SAmerica	10000	Sumidouro6	21	PRJEB29074
so2	Argentina(a)	SAmerica	500	Aconcagua	23	PRJEB29074
so6	Andaman Islands(a)	SAmerica	historical	Andaman Islands	137	PRJEB29074
so7	Chile(a)	SAmerica	4500	Ayayema	96	PRJEB29074
so8	Chile(a)	SAmerica	6000	PuntaSantaAna	13	PRJEB29074
so9	Brazil(a)	SAmerica	10000	Sumidouro5 Caverna do Sumidouro	163	PRJEB29074
br1	Brazil(a)	SAmerica	8,000 to 1,000	Sambaqui (shellmound) societies	20	PRJEB51863
my3	Mexico(a)	SAmerica	800-1000	Chichén Itzá in Yucatán, Mexico mix	134	PRJEB73567
my6	Mexico(a)	SAmerica	800-1000	Chichén Itzá in Yucatán, Mexico mix	171	PRJEB73567
my7	Mexico(a)	SAmerica	800-1000	Chichén Itzá in Yucatán, Mexico mix	305	PRJEB73567
b1		birds		African ostrich (Struthio camelus australis) b1		Ensembl
b2		birds		Bengalese finch (Lonchura striata domestica) b2		Ensembl
b3		birds		Blue tit (Cyanistes caeruleus) b3		Ensembl
b4		birds		Blue-crowned manakin (Lepidothrix coronata) b4		Ensembl
b5		birds		Budgerigar (Melopsittacus undulatus) b5		Ensembl
b6		birds		Burrowing owl (Athene cunicularia) b6		Ensembl
b7		birds		Chicken (Gallus gallus) b7		Ensembl
b8		birds		Chilean tinamou (Nothoprocta perdicaria) b8		Ensembl
b9		birds		Collared flycatcher (Ficedula albicollis) b9		Ensembl
b10		birds		Common canary (Serinus canaria) b10		Ensembl
b11		birds		Common kestrel (Falco tinnunculus) b11		Ensembl
b12		birds		Dark-eyed junco (Junco hyemalis) b12		Ensembl
b13		birds		Duck (Anas platyrhynchos platyrhynchos) b13		Ensembl
b14		birds		Eastern buzzard (Buteo japonicus) b14		Ensembl
b15		birds		Eastern spot-billed duck (Anas zonorhyncha) b15		Ensembl
b16		birds		Emu (Dromaius novaehollandiae) b16		Ensembl
b17		birds		Eurasian eagle-owl (Bubo bubo) b17		Ensembl
b18		birds		Eurasian sparrowhawk (Accipiter nisus)雀鹰 b18		Ensembl
b19		birds		Golden eagle (Aquila chrysaetos chrysaetos) b19		Ensembl
b20		birds		Golden pheasant (Chrysolophus pictus) b20		Ensembl
b21		birds		Golden-collared manakin (Manacus vitellinus) b21		Ensembl
b22		birds		Gouldian finch (Erythrura gouldiae) b22		Ensembl
b23		birds		Great spotted kiwi (Apteryx haastii) b23		Ensembl
b24		birds		Great Tit (Parus major) b24		Ensembl
b25		birds		Helmeted guineafowl (Numida meleagris) b25		Ensembl
b26		birds		Indian peafowl (Pavo cristatus)孔雀 b26		Ensembl
b27		birds		Japanese quail (Coturnix japonica) b27		Ensembl
b28		birds		Kakapo (Strigops habroptila) b28		Ensembl
b29		birds		Little spotted kiwi (Apteryx owenii) b29		Ensembl
b30		birds		Mallard (Anas platyrhynchos) b30		Ensembl
b31		birds		Medium ground-finch (Geospiza fortis) b31		Ensembl
b32		birds		Muscovy Duck (Cairina moschata domestica) b32		Ensembl
b33		birds		New Caledonian crow (Corvus moneduloides) b33		Ensembl
b34		birds		Northern spotted owl (Strix occidentalis caurina) b34		Ensembl
b35		birds		Okarito brown kiwi (Apteryx rowi) b35		Ensembl
b36		birds		Oriental scops-owl (Otus sunia) b36		Ensembl
b37		birds		Pink-footed goose (Anser brachyrhynchus) b37		Ensembl
b38		birds		Ring-necked pheasant (Phasianus colchicus) b38		Ensembl
b39		birds		Ruff (Calidris pugnax) b39		Ensembl
b40		birds		Rufous-capped babbler (Cyanoderma ruficeps) b40		Ensembl
b42		birds		Small tree finch (Camarhynchus parvulus) b42		Ensembl
b43		birds		Spoon-billed sandpiper (Calidris pygmaea) b43		Ensembl
b44		birds		Superb fairywren (Malurus cyaneus samueli) b44		Ensembl
b45		birds		Swainson's thrush (Catharus ustulatus) b45		Ensembl
b46		birds		Swan goose (Anser cygnoides) b46		Ensembl
b47		birds		Turkey (Meleagris gallopavo) b47		Ensembl
b48		birds		White-throated sparrow (Zonotrichia albicollis) b48		Ensembl
b49		birds		Yellow-billed parrot (Amazona collaria) b49		Ensembl
b50		birds		Zebra finch (Taeniopygia guttata) b50		Ensembl
F1		fish		Amazon molly (Poecilia formosa) F1		Ensembl
F2		fish		Asian bonytongue骨舌鱼 (Scleropages formosus) F2		Ensembl
F3		fish		Atlantic cod (Gadus morhua) F3		Ensembl
F4		fish		Atlantic herring (Clupea harengus)F4		Ensembl
F5		fish		Atlantic salmon (Salmo salar) F5		Ensembl
F6		fish		Ballan wrasse (Labrus bergylta) F6		Ensembl
F7		fish		Barramundi perch (Lates calcarifer) F7		Ensembl
F8		fish		Bicolor damselfish (Stegastes partitus) F8		Ensembl
F9		fish		Blue tilapia (Oreochromis aureus) F9		Ensembl
F10		fish		Blunt-snouted clingfish (Gouania willdenowi) F10		Ensembl
F11		fish		Brown trout (Salmo trutta) F11		Ensembl
F12		fish		Burton's mouthbrooder (Haplochromis burtoni) F12		Ensembl
F13		fish		Channel bull blenny (Cottoperca gobio) F13		Ensembl
F14		fish		Channel catfish (Ictalurus punctatus) F14		Ensembl
F15		fish		Chinese medaka (Oryzias sinensis) F15		Ensembl
F16		fish		Chinook salmon (Oncorhynchus tshawytscha) F16		Ensembl
F17		fish		Climbing perch (Anabas testudineus) F17		Ensembl
F18		fish		Clown anemonefish (Amphiprion ocellaris) F18		Ensembl
F19		fish		Coho salmon (Oncorhynchus kisutch) F19		Ensembl
F20		fish		Common carp (Cyprinus carpio carpio) F20		Ensembl
F21		fish		Common carp german mirror (Cyprinus carpio) F21		Ensembl
F22		fish		Denticle herring (Denticeps clupeoides) F22		Ensembl
F23		fish		Eastern happy (Astatotilapia calliptera) F23		Ensembl
F24		fish		Electric eel (Electrophorus electricus) F24		Ensembl
F25		fish		European seabass (Dicentrarchus labrax) F25		Ensembl
F26		fish		Fugu (Takifugu rubripes)河豚 F26		Ensembl
F27		fish		Gilthead seabream (Sparus aurata) F27		Ensembl
F28		fish		Golden-line barbel (Sinocyclocheilus grahami) F28		Ensembl
F29		fish		Goldfish (Carassius auratus F29)		Ensembl
F30		fish		Greater amberjack (Seriola dumerili) F30		Ensembl
F31		fish		Guppy (Poecilia reticulata) F31		Ensembl
F32		fish		Horned golden-line barbel (Sinocyclocheilus rhinocerous) F32		Ensembl
F33		fish		Huchen (Hucho hucho) F33		Ensembl
F34		fish		Indian glassy fish (Parambassis ranga) F34		Ensembl
F35		fish		Indian medaka (Oryzias melastigma)F35		Ensembl
F36		fish		Javanese ricefish (Oryzias javanicus) F36		Ensembl
F37		fish		Jewelled blenny (Salarias fasciatus) F37		Ensembl
F38		fish		Large yellow croaker (Larimichthys crocea) F38		Ensembl
F39		fish		Live sharksucker (Echeneis naucrates) F39		Ensembl
F40		fish		Lumpfish (Cyclopterus lumpus) F40		Ensembl
F41		fish		Lyretail cichlid (Neolamprologus brichardi) F41		Ensembl
F42		fish		Makobe Island cichlid (Pundamilia nyererei) F42		Ensembl
F43		fish		Mangrove rivulus (Kryptolebias marmoratus) F43		Ensembl
F44		fish		Mexican tetra (Astyanax mexicanus) F44		Ensembl
F45		fish		Midas cichlid (Amphilophus citrinellus) F45		Ensembl
F46		fish		Monterrey platyfish (Xiphophorus couchianus) F46		Ensembl
F47		fish		Mummichog (Fundulus heteroclitus) F47		Ensembl
F48		fish		Nile tilapia (Oreochromis niloticus) F48		Ensembl
F49		fish		Northern pike (Esox lucius) F49		Ensembl
F50		fish		Ocean sunfish (Mola mola) F50		Ensembl
F51		fish		Orange clownfish (Amphiprion percula) F51		Ensembl
F52		fish		Orbiculate cardinalfish (Sphaeramia orbicularis) F52		Ensembl
F53		fish		Pachon cavefish (Astyanax mexicanus) F53		Ensembl
F54		fish		Paramormyrops kingsleyae F54		Ensembl
F55		fish		Periophthalmus magnuspinnatus F55		Ensembl
F56		fish		Pike-perch (Sander lucioperca) F56		Ensembl
F57		fish		Pinecone soldierfish (Myripristis murdjan) F57		Ensembl
F58		fish		Platyfish (Xiphophorus maculatus) F58		Ensembl
F59		fish		Rainbow trout (Oncorhynchus mykiss) F59		Ensembl
F60		fish		Red-bellied piranha (Pygocentrus nattereri) F60		Ensembl
F61		fish		Reedfish (Erpetoichthys calabaricus) F61		Ensembl
F62		fish		Round goby (Neogobius melanostomus) F62		Ensembl
F63		fish		Sailfin molly (Poecilia latipinna) F63		Ensembl
F64		fish		Sheepshead minnow (Cyprinodon variegatus) F64		Ensembl
F65		fish		Shortfin molly (Poecilia mexicana) F65		Ensembl
F66		fish		Siamese fighting fish (Betta splendens) F66		Ensembl
F67		fish		Spiny chromis (Acanthochromis polyacanthus) F67		Ensembl
F68		fish		Spotted gar (Lepisosteus oculatus) F68		Ensembl
F69		fish		Stickleback (Gasterosteus aculeatus) F69		Ensembl
F70		fish		Swamp eel (Monopterus albus) F70		Ensembl
F71		fish		Tetraodon (Tetraodon nigroviridis) F71		Ensembl
F72		fish		Tiger tail seahorse (Hippocampus comes) F72		Ensembl
F73		fish		Tongue sole (Cynoglossus semilaevis) F73		Ensembl
F74		fish		Turbot (Scophthalmus maximus) F74		Ensembl
F75		fish		Turquoise killifish (Nothobranchius furzeri) F75		Ensembl
F76		fish		Western mosquitofish (Gambusia affinis) F76		Ensembl
F77		fish		Yellowtail amberjack (Seriola lalandi dorsalis) F77		Ensembl
F78		fish		Zebra mbuna (Maylandia zebra) F78		Ensembl
F79		fish		Zebrafish (Danio rerio) F79		Ensembl
F80		fish		Zig-zag eel (Mastacembelus armatus) F80		Ensembl
lc1	Tanzania	fish		Latimeria chalumnae	80	DRX001881
st1		fish		sturgeon	1.8	GCF_010645085.2
m10		Marine		Neophocaena_phocaenoides	2.6	CNP0000758
m12		Marine		Phoca_largha	2.4	CNP0000758
m13		Marine		Phoca_vitulina	2.3	CNP0000758
m14		Marine		Pseudorca_crassidens	2.3	CNP0000758
m15		Marine		Pusa_sibirica	2.4	CNP0000758
m16		Marine		Tursiops_aduncus	2.3	CNP0000758
m17		Marine		Zalophus_californianus	2.3	CNP0000758
m1		Marine		Arctocephalus_australis	2.4	CNP0000758
m2		Marine		Balaenoptera_bryde	2.3	CNP0000758
m3		Marine		Balaenoptera_musculus	2.4	CNP0000758
m4		Marine		Grampus_griseus	2.6	CNP0000758
m5		Marine		Kogia_breviceps	2.4	CNP0000758
m6		Marine		Kogia_sima	2.5	CNP0000758
m7		Marine		Lagenorhynchus_australis	2.3	CNP0000758
m8		Marine		Lagenorhynchus_obliquidens	2.3	CNP0000758
m9		Marine		Mesoplodon_densirostris	2.4	CNP0000758
d1		rodents		Algerian mouse (Mus spretus) D1		Ensembl
d2		rodents		Alpine marmot (Marmota marmota marmota) D2		Ensembl
d3		rodents		American beaver (Castor canadensis) D3		Ensembl
d4		rodents		Arctic ground squirrel (Urocitellus parryii) D4		Ensembl
d5		rodents		Brazilian guinea pig (Cavia aperea) D5		Ensembl
d6		rodents		Chinese hamster CHOK1GS (Cricetulus griseus) D6		Ensembl
d7		rodents		Damara mole rat (Fukomys damarensis) D7		Ensembl
d8		rodents		Daurian ground squirrel (Spermophilus dauricus) D8		Ensembl
d9		rodents		Degu (Octodon degus) D9		Ensembl
d10		rodents		Eurasian red squirrel (Sciurus vulgaris) D10		Ensembl
d11		rodents		Galilee mountains blind mole rat (Nannospalax galili) D11		Ensembl
d12		rodents		Golden Hamster (Mesocricetus auratus) D12		Ensembl
d13		rodents		Guinea Pig (Cavia porcellus) D13		Ensembl
d14		rodents		Kangaroo rat (Dipodomys ordii) D14		Ensembl
d15		rodents		Lesser Egyptian jerboa (Jaculus jaculus) D15		Ensembl
d16		rodents		Long-tailed chinchilla (Chinchilla lanigera) D16		Ensembl
d17		rodents		Mongolian gerbil (Meriones unguiculatus) D17		Ensembl
d18		rodents		Mouse (Mus musculus) D18		Ensembl
d19		rodents		Naked mole-rat female (Heterocephalus glaber) D19		Ensembl
d20		rodents		Northern American deer mouse (Peromyscus maniculatus bairdii) D20		Ensembl
d21		rodents		Pika (Ochotona princeps) D21		Ensembl
d22		rodents		Prairie vole (Microtus ochrogaster) D22		Ensembl
d23		rodents		Rabbit (Oryctolagus cuniculus) D23		Ensembl
d24		rodents		Rat (Rattus norvegicus) D24		Ensembl
d25		rodents		Ryukyu mouse (Mus caroli) D25		Ensembl
d26		rodents		Shrew mouse (Mus pahari) D26		Ensembl
d27		rodents		Squirrel (Ictidomys tridecemlineatus) D27		Ensembl
d28		rodents		Steppe mouse (Mus spicilegus) D28		Ensembl
d29		rodents		Tree Shrew (Tupaia belangeri) D29		Ensembl
L1		Laurasiatheria		Alpaca (Vicugna pacos) L1		Ensembl
L2		Laurasiatheria		American bison (Bison bison bison) L2		Ensembl
L3		Laurasiatheria		American black bear (Ursus americanus) L3		Ensembl
L4		Laurasiatheria		American mink (Neovison vison) L4		Ensembl
L5		Laurasiatheria		Arabian camel (Camelus dromedarius) L5		Ensembl
L6		Laurasiatheria		Asiatic black bear (Ursus thibetanus thibetanus) L6		Ensembl
L7		Laurasiatheria		Beluga whale (Delphinapterus leucas) L7		Ensembl
L8		Laurasiatheria		Blue whale (Balaenoptera musculus) L8		Ensembl
L9		Laurasiatheria		California sea lion (Zalophus californianus) L9		Ensembl
L10		Laurasiatheria		Canada lynx (Lynx canadensis) L10		Ensembl
L11		Laurasiatheria		Cat (Felis catus) L11		Ensembl
L12		Laurasiatheria		Chacoan peccary (Catagonus wagneri) L12		Ensembl
L13		Laurasiatheria		Cow (Bos taurus) L13		Ensembl
L14		Laurasiatheria		Dingo (Canis lupus dingo) L14		Ensembl
L15		Laurasiatheria		Dog (Canis lupus familiaris) L15		Ensembl
L16		Laurasiatheria		Dolphin (Tursiops truncatus) L16		Ensembl
L17		Laurasiatheria		Domestic yak (Bos grunniens) L17		Ensembl
L18		Laurasiatheria		Donkey (Equus asinus) L18		Ensembl
L19		Laurasiatheria		Ferret (Mustela putorius furo) L19		Ensembl
L20		Laurasiatheria		Giant panda (Ailuropoda melanoleuca) L20		Ensembl
L21		Laurasiatheria		Goat (Capra hircus) L21		Ensembl
L22		Laurasiatheria		Greater horseshoe bat (Rhinolophus ferrumequinum) L22		Ensembl
L23		Laurasiatheria		Hedgehog (Erinaceus europaeus) L23		Ensembl
L24		Laurasiatheria		Horse (Equus caballus) L24		Ensembl
L25		Laurasiatheria		Hybrid - Bos Indicus (Bos indicus x Bos taurus) L25		Ensembl
L26		Laurasiatheria		Leopard (Panthera pardus) L26		Ensembl
L27		Laurasiatheria		Lion (Panthera leo) L27		Ensembl
L28		Laurasiatheria		Meerkat (Suricata suricatta) L28		Ensembl
L29		Laurasiatheria		Megabat (Pteropus vampyrus) L29		Ensembl
L30		Laurasiatheria		Microbat (Myotis lucifugus) L30		Ensembl
L31		Laurasiatheria		Narwhal (Monodon monoceros) L31		Ensembl
L32		Laurasiatheria		Pig (Sus scrofa) L32		Ensembl
L33		Laurasiatheria		Polar bear (Ursus maritimus) L33		Ensembl
L34		Laurasiatheria		Red fox (Vulpes vulpes) L34		Ensembl
L35		Laurasiatheria		Sheep (Ovis aries) L35		Ensembl
L36		Laurasiatheria		Shrew (Sorex araneus) L36		Ensembl
L37		Laurasiatheria		Siberian musk deer (Moschus moschiferus) L37		Ensembl
L38		Laurasiatheria		Sperm whale (Physeter catodon) L38		Ensembl
L39		Laurasiatheria		Tiger (Panthera tigris altaica) L39		Ensembl
L40		Laurasiatheria		Vaquita (Phocoena sinus) L40		Ensembl
L41		Laurasiatheria		Wild yak (Bos mutus) L41		Ensembl
L42		Laurasiatheria		Yarkand deer (Cervus hanglu yarkandensis) L42		Ensembl
R1		Reptile		Abingdon island giant tortoise (Chelonoidis abingdonii) R1		Ensembl
R2		Reptile		Agassiz's desert tortoise (Gopherus agassizii) R2		Ensembl
R3		Reptile		Argentine black and white tegu (Salvator merianae) R3		Ensembl
R4		Reptile		Australian saltwater crocodile (Crocodylus porosus) R4		Ensembl
R5		Reptile		Blue-ringed sea krait (Laticauda laticaudata) R5		Ensembl
R6		Reptile		Central bearded dragon (Pogona vitticeps) R6		Ensembl
R7		Reptile		Chinese softshell turtle (Pelodiscus sinensis) R7		Ensembl
R8		Reptile		Common snapping turtle (Chelydra serpentina) R8		Ensembl
R9		Reptile		Common wall lizard (Podarcis muralis) R9		Ensembl
R10		Reptile		Eastern brown snake (Pseudonaja textilis) R10		Ensembl
R11		Reptile		Goodes thornscrub tortoise (Gopherus evgoodei) R11		Ensembl
R12		Reptile		Green anole (Anolis carolinensis) R12		Ensembl
R13		Reptile		Indian cobra (Naja naja)眼镜蛇 R13		Ensembl
R14		Reptile		Komodo dragon (Varanus komodoensis) R14		Ensembl
R15		Reptile		Mainland tiger snake (Notechis scutatus) R15		Ensembl
R16		Reptile		Painted turtle (Chrysemys picta bellii) R16		Ensembl
R17		Reptile		Three-toed box turtle (Terrapene carolina triunguis) R17		Ensembl
R18		Reptile		Tuatara (Sphenodon punctatus) R18		Ensembl
R19		Reptile		West African mud turtle (Pelusios castaneus) R19		Ensembl
x1		Others		Armadillo (Dasypus novemcinctus) x1		Ensembl
x2		Others		Sloth (Choloepus hoffmanni) x2		Ensembl
x3		Others		Elephant (Loxodonta africana) x3		Ensembl
x4		Others		Hyrax (Procavia capensis) x4		Ensembl
x5		Others		Lesser hedgehog tenrec (Echinops telfairi) x5		Ensembl
x6		Others		Leishan spiny toad (Leptobrachium leishanense) x6		Ensembl
x7		Others		Tropical clawed frog (Xenopus tropicalis) x7		Ensembl
x8		Others		C.intestinalis (Ciona intestinalis) x8		Ensembl
x9		Others		C.savignyi (Ciona savignyi) x9		Ensembl
x10		Others		Caenorhabditis elegans (PRJNA13758) (Caenorhabditis elegans) x10		Ensembl
x11		Others		Drosophila melanogaster (Fruit fly) (Drosophila melanogaster) x11		Ensembl
x12		Others		Saccharomyces cerevisiae (Saccharomyces cerevisiae S288c) x12		Ensembl
x13		Others		Common wombat (Vombatus ursinus)普通袋熊 x13		Ensembl
x14		Others		Koala (Phascolarctos cinereus) x14		Ensembl
x15		Others		Opossum (Monodelphis domestica)负鼠 x15		Ensembl
x16		Others		Platypus (Ornithorhynchus anatinus)鸭嘴兽 x16		Ensembl
x17		Others		Tasmanian devil (Sarcophilus harrisii)袋獾 x17		Ensembl
x18		Others		Wallaby (Notamacropus eugenii)小袋鼠 x18		Ensembl
x19		Others		Coelacanth (Latimeria chalumnae) x19		Ensembl
x20		Others		Elephant shark (Callorhinchus milii) x20		Ensembl
x21		Others		Hagfish (Eptatretus burgeri) x21 八目鳗		Ensembl
x22		Others		Lamprey (Petromyzon marinus) x22 七鳃鳗		Ensembl
p1		primates		Aotus_nancymaae.Anan_2.0.dna.toplevel		Ensembl
p10		primates		Papio_anubis.Panubis1.0.dna.toplevel		Ensembl
p11		primates		Piliocolobus_tephrosceles.ASM277652v2.dna.toplevel		Ensembl
p12		primates		Pongo_abelii.Susie_PABv2.dna.toplevel		Ensembl
p13		primates		Colobus_angolensis_palliatus.Cang.pa_1.0.dna.toplevel		Ensembl
p14		primates		Rhinopithecus_bieti.ASM169854v1.dna.toplevel		Ensembl
p15		primates		Saimiri_boliviensis_boliviensis.SaiBol1.0.dna.toplevel		Ensembl
p16		primates		Otolemur_garnettii.OtoGar3.dna.toplevel		Ensembl
p17		primates		Propithecus_coquereli.Pcoq_1.0.dna.toplevel		Ensembl
p18		primates		Macaca_fascicularis.Macaca_fascicularis_6.0.dna.toplevel		Ensembl
p19		primates		Mandrillus_leucophaeus.Mleu.le_1.0.dna.toplevel		Ensembl
p2		primates		Callithrix_jacchus.mCalJac1.pat.X.dna.toplevel		Ensembl
p20		primates		Theropithecus_gelada.Tgel_1.0.dna.toplevel		Ensembl
p21		primates		Nomascus_leucogenys.Nleu_3.0.dna.toplevel		Ensembl
p22		primates		Prolemur_simus.Prosim_1.0.dna.toplevel		Ensembl
p23		primates		Macaca_mulatta.Mmul_10.dna.toplevel		Ensembl
p24		primates		Aotus_nancymaae.Anan_2.0.dna.toplevel		Ensembl
p25		primates		Microcebus_murinus.Mmur_3.0.dna.toplevel		Ensembl
p26		primates		Papio_anubis.Panubis1.0.dna.toplevel		Ensembl
p27		primates		Cebus_imitator.Cebus_imitator-1.0.dna.toplevel		Ensembl
p28		primates		Macaca_nemestrina.Mnem_1.0.dna.toplevel		Ensembl
p29		primates		Cercocebus_atys.Caty_1.0.dna.toplevel		Ensembl
p3		primates		Cercocebus_atys.Caty_1.0.dna.toplevel		Ensembl
p30		primates		Carlito_syrichta.Tarsius_syrichta-2.0.1.dna.toplevel		Ensembl
p31		primates		Piliocolobus_tephrosceles.ASM277652v2.dna.toplevel		Ensembl
p32		primates		p32 Chlorocebus_sabaeus.ChlSab1.1.dna.toplevel		Ensembl
p33		primates		p33 Callithrix_jacchus.mCalJac1.pat.X.dna.toplevel		Ensembl
p4		primates		p4 Chlorocebus_sabaeus.ChlSab1.1.dna.toplevel		Ensembl
p5		primates		p5 Gorilla_gorilla.gorGor4.dna.toplevel		Ensembl
p6		primates		p6 Homo_sapiens.GRCh38.dna.toplevel		Ensembl
p7		primates		p7 Macaca_nemestrina.Mnem_1.0.dna.toplevel		Ensembl
p8		primates		p8 Pan_paniscus.panpan1.1.dna.toplevel		Ensembl
p9		primates		p9 Pan_troglodytes.Pan_tro_3.0.dna.toplevel		Ensembl
ap1	China	Others		SRR1552607 Alpaca genome sequencing 羊驼	45	PRJNA233565
cm1	IRAN	Others		CAMEL cm1- IRAN_B_Run_189	95	SRP107089
cm2		Others		Camel-2	80	SRP107089
dp1		Others		Atlantic bottlenose dolphin (Tursiops truncatus)	89	PRJNA476133
dp2		Others		bottlenosed dolphin Tursiops truncatus	96	PRJNA20367
dp3n		Others		Atlantic bottlenose dolphin (Tursiops truncatus)	104	PRJNA20367
gb1	Indonesia	Others		Javan gibbon	108	PRJNA575281
ha1		Others		USA Hawaiian SAMEA3302908	106	PRJEB9586
hu1		Others		humpback whale座头鲸	9	GCA_004329385
pr1	Australia	Others		Parrot,male budgerigar (Melopsittacus undulatus)	89	PRJEB1588
rr1	China	Others		Rhinopithecus roxellana	96	PRJNA283338
rr2	China	Others		Rhinopithecus roxellana RR12-RR14	91	PRJNA283338
rt1		Others		Rangifer tarandus caribou sample-1	88	PRJNA843030
rt2		Others		Rangifer tarandus caribou sample-2	123	PRJNA843030
rt3		Others		Rangifer tarandus caribou sample-3	72	PRJNA843030
su1	Korea	Others		Sus scrofa	105	PRJNA254936
lc5		fish		african coelacanth fLatCha1	150	PRJNA1141629
lm1		fish		Indonesian coelacanth Latimeria menadoensis	180	DRX001955
lu1		fish		south american lungfish	102	PRJNA981572
lu3		fish		west african lungfish	199	PRJNA813995
lu4		fish		south american lungfish	120	PRJNA808322
				Note: (a): ancient sample; SAmerica: South America; NAmerica: North America. References are ENA (fastq format) or SRA accession numbers plus Ensembl (fa, fasta or fna formats with the full-genome file size of around 200M~60G). Marine: a group of marine animals[T1]. Others are samples mainly for animals not included in the above categories. [T1] Comparative genomics provides insights into the aqua…
