# Supplementary material for: Recent Observations on Deep-Rooted Polymorphism Patterns of Language/Cognition Genes
Source: Research Square preprint supplement (doi:10.21203/rs.3.rs-6910300/v1), 2025-09-26
Supplement: Supplementary file 3 [file 8b15fb3788d97e96ea8ff76a.xlsx]

## Sheet: Sheet1
	ASPM rs10754215	ASPM rs12677	ASPM rs1332663	ASPM rs1571964	ASPM rs2878749	ASPM rs3737110	ASPM rs4915337	ASPM rs877897	ASPM rs955927	ASPM rs964201	ATP2C2 rs13334642	ATP2C2 rs16973859	ATP2C2 rs2435172	ATP2C2 rs247818	ATP2C2 rs247885	ATP2C2 rs4782948	ATP2C2 rs4782970	ATP2C2 rs62050917	ATP2C2 rs62640931	ATP2C2 rs62640932	ATP2C2 rs62640935	ATP2C2 rs74038217	ATP2C2 rs78371901	CMIP rs114894868	CMIP rs1187121850	CMIP rs16955675	CMIP rs183075361	CMIP rs183876152	CMIP rs201316817	CMIP rs2288011	CMIP rs34119643	CMIP rs35429777	CMIP rs57603843	CMIP rs60152409	CMIP rs74031247	CMIP rs79979027	CNTNAP2 rs1062071	CNTNAP2 rs1062072	CNTNAP2 rs1468370	CNTNAP2 rs1479837	CNTNAP2 rs1637841	CNTNAP2 rs1637842	CNTNAP2 rs2373284	CNTNAP2 rs3194	CNTNAP2 rs535454043	CNTNAP2 rs61732853	CNTNAP2 rs700308	CNTNAP2 rs700309	CNTNAP2 rs987456
	ASPM10	ASPM-1	ASPM-5	ASPM-6	ASPM-7	ASPM-8	ASPM-9	ASPM-2	ASPM-3	ASPM-4	ATP-8	ATP-7	ATP-11	ATP-13	ATP-12	ATP-10	ATP-9	ATP-6	ATP-5	ATP-4	ATP-3	ATP-2	ATP-1	CMI-4	CMI-13	CMI-11	CMI-3	CMI-2	CMI-1	CMI-12	CMI-10	CMI-9	CMI-8	CMI-7	CMI-6	CMI-5	CNTN-6	CNTN-5	CNTN-4	CNTN-3	CNTN-2	CNTN-1	CNTN-12	CNTN-10	CNTN-11	CNTN-13	CNTN-9	CNTN-8	CNTN-7
	snp1	snp2	snp3	snp4	snp5	snp6	snp7	snp8	snp9	snp10	snp11	snp12	snp13	snp14	snp15	snp16	snp17	snp18	snp19	snp20	snp21	snp22	snp23	snp24	snp25	snp26	snp27	snp28	snp29	snp30	snp31	snp32	snp33	snp34	snp35	snp36	snp37	snp38	snp39	snp40	snp41	snp42	snp43	snp44	snp45	snp46	snp47	snp48	snp49
et1	TC	AG	TC	G	T	C	A	G	A	G	0	T	0	0	0	0	0	0	C	0	G	0	G	0	0	0	C	0	0	0	0	0	0	0	C	0	0	0	0	0	0	0	0	0	0	0	C	0	C
ga1	T	AG	C	G	TC	C	AT	AG	AT	G	G	T	G	C	A	G	A	C	C	GC	G	G	0	C	0	G	C	G	C	GC	0	G	C	C	0	C	AT	G	G	AC	TG	TC	TC	A	G	C	C	TG	C
ga2	C	G	TC	G	T	C	AT	G	A	G	G	T	G	C	A	G	A	C	C	C	G	G	G	C	C	GC	C	G	C	GC	C	G	AC	C	TC	C	AT	AG	G	AC	TG	C	TC	A	G	C	TC	TG	AC
ga3	TC	A	TC	G	T	C	A	A	A	G	G	T	G	C	A	0	A	C	C	C	G	0	G	C	0	G	C	G	C	G	C	G	C	C	0	C	A	A	G	C	G	T	C	A	G	C	C	G	C
ga4	TC	G	C	A	TC	C	AT	AG	A	G	G	TC	G	AC	A	G	A	C	C	C	GC	AG	0	C	0	G	C	G	C	GC	C	G	C	0	0	0	AT	AG	G	A	T	C	T	A	G	C	0	G	C
ga5	0	AG	TC	G	T	C	AT	G	A	G	TG	T	G	C	A	G	A	C	C	C	G	G	G	C	0	G	C	0	C	GC	C	G	C	C	C	C	T	G	G	A	G	T	T	A	0	C	GC	G	AC
ga6	TC	0	T	G	T	C	AT	A	A	G	G	T	G	C	A	G	A	C	C	C	G	G	G	C	0	GC	C	G	C	G	C	G	C	C	C	C	A	A	G	AC	T	C	TC	A	G	C	C	TG	AC
ke1	TC	AG	TC	G	T	C	AT	AG	A	G	G	T	G	C	A	G	A	C	C	C	G	G	G	C	0	G	C	G	C	C	0	0	C	C	0	C	A	A	TG	A	TG	C	T	A	G	C	C	TG	A
mo1l	TC	0	0	0	0	0	T	0	0	0	0	0	0	0	0	0	0	TC	0	0	0	0	0	0	0	0	C	0	0	0	0	0	0	0	0	0	0	0	0	AC	0	0	T	0	0	0	0	0	AC
mo1s	TC	0	0	0	0	0	0	0	0	0	0	0	0	0	0	0	0	0	0	0	0	0	0	0	0	0	0	0	0	0	0	0	0	0	0	0	0	0	0	0	0	0	0	0	0	0	0	0	A
sa1	C	G	C	G	T	C	A	G	A	G	G	T	G	C	A	G	A	C	C	C	G	G	G	C	0	0	C	G	C	C	C	G	C	C	0	C	0	A	TG	AC	T	TC	C	A	G	C	C	G	0
sa2	C	G	C	G	ATC	C	A	G	A	G	G	T	G	C	A	A	AC	GC	0	C	G	G	G	C	0	G	C	G	C	GC	C	G	C	C	C	AT	A	A	G	C	T	C	TC	A	G	TC	C	G	C
sa3	TC	AG	ATC	AG	AT	C	AT	AG	A	TG	0	0	0	0	0	0	0	0	0	0	0	0	G	0	0	0	0	0	0	C	0	0	0	0	0	0	0	0	G	AC	ATG	TC	TC	0	G	C	C	G	A
ss2	TC	G	C	G	0	0	0	A	A	0	G	TC	0	C	A	G	A	TC	C	C	G	G	G	0	C	G	ATC	G	C	0	0	0	C	C	C	0	0	G	0	AC	0	C	C	A	G	0	C	0	A
ss3	0	0	0	0	0	0	0	0	0	0	0	0	0	0	0	0	0	0	0	0	0	0	0	0	0	0	0	0	0	0	0	0	0	0	0	0	0	0	0	0	0	0	0	0	0	0	0	0	0
mt1	C	G	C	G	ATGC	C	A	G	A	G	G	T	G	C	A	G	A	C	C	C	G	G	AG	C	A	G	C	G	C	G	C	G	C	C	C	C	T	G	G	C	T	C	TC	0	G	C	C	G	C
sm5	TC	0	TC	G	0	0	T	A	A	0	G	TC	G	C	0	G	A	TC	C	0	G	G	G	0	0	0	ATC	G	0	GC	0	0	0	0	C	0	T	G	0	C	TG	C	TC	A	0	0	C	0	AC
sd1	0	0	0	0	0	0	0	0	0	0	0	0	0	0	0	0	0	0	0	0	0	0	0	0	0	0	0	0	0	0	0	0	0	0	0	0	0	0	0	0	0	0	0	0	0	0	0	0	0
af1	T	A	T	A	ATGC	A	T	A	T	G	G	T	G	C	A	G	C	C	C	C	G	G	TG	C	0	G	C	G	C	C	C	G	C	C	C	C	AT	AG	T	A	TG	TC	T	A	G	C	C	T	AC
af2	T	AG	TC	AG	ATGC	C	AT	AG	A	G	0	0	G	C	A	A	A	C	C	C	G	G	G	C	0	0	0	G	C	C	C	G	C	C	C	0	A	A	TG	A	TG	T	T	A	G	C	C	TG	C
sw1	TC	0	0	0	0	0	0	0	0	G	0	T	G	0	0	G	0	C	C	0	0	0	G	0	0	0	C	G	0	0	0	G	0	0	0	0	0	0	0	0	0	0	T	0	0	C	0	0	AC
vs1	C	G	0	0	0	0	0	G	A	0	G	T	G	C	A	G	A	C	C	0	G	G	G	0	0	G	0	0	C	GC	0	G	C	C	C	C	0	0	G	0	0	T	0	0	0	0	C	0	0
cy1	TC	AG	TC	AG	TC	C	AT	AG	AT	G	G	T	G	C	0	G	A	C	C	C	0	0	G	C	0	G	C	G	C	C	C	G	C	C	C	C	A	G	T	AC	TG	T	T	0	AG	C	C	G	A
cy2	T	A	T	A	TGC	A	T	A	T	G	G	0	G	TC	A	G	0	C	C	0	A	0	G	C	0	0	C	G	C	C	C	0	C	0	C	0	T	G	G	AC	0	T	T	0	G	0	C	G	0
cy3	T	A	T	A	AT	0	T	A	T	G	0	T	G	C	A	0	A	0	C	C	G	G	G	C	0	G	C	G	C	0	0	G	C	C	C	C	A	A	TG	A	G	T	T	AC	G	C	C	TG	A
cy4	T	0	T	A	GC	A	T	A	T	G	G	T	G	C	0	G	A	C	C	C	0	G	G	C	0	G	C	G	C	C	0	0	C	0	C	0	AT	AG	G	C	G	T	C	0	G	C	C	G	AC
cy5	TC	A	T	G	TC	AC	T	A	AT	G	0	0	0	C	A	A	A	C	C	C	0	0	G	C	0	G	0	G	C	G	C	0	C	0	C	C	A	G	0	0	G	T	TC	C	G	C	C	G	0
cy6	T	A	T	A	C	A	T	A	T	G	0	T	G	0	A	G	A	C	C	C	G	G	0	C	0	G	C	G	C	G	C	G	C	C	C	C	A	0	G	A	G	T	T	C	G	C	C	G	0
gu1	C	G	C	G	ATGC	0	A	G	A	G	0	C	G	C	A	G	0	0	0	C	C	0	0	C	0	0	C	G	0	GC	C	0	C	C	C	C	AT	A	0	0	T	C	0	A	G	T	C	G	C
gu2	TC	A	T	AG	ATC	C	T	AT	A	G	G	TC	TG	C	A	G	A	C	C	C	G	G	G	C	0	G	C	G	C	GC	C	G	C	C	C	C	T	0	G	A	AT	C	C	A	G	C	C	G	C
gu3	TC	AG	TC	AG	ATGC	C	AT	AG	A	G	G	TC	TGC	C	A	G	A	C	C	C	GC	G	G	C	0	GC	C	G	C	GC	C	G	C	C	C	C	AT	AG	G	C	T	C	TC	A	G	C	C	G	C
yo1	C	G	C	G	ATG	C	A	G	A	G	G	0	0	C	A	G	A	C	C	C	G	G	G	C	0	G	C	G	C	G	C	G	C	C	C	C	AT	A	G	A	TG	C	C	A	G	C	C	G	0
yo3	TC	AG	TC	AG	ATGC	C	AT	AG	A	TG	0	T	G	C	A	G	A	C	C	C	0	G	G	C	0	G	C	G	C	GC	C	G	C	C	0	C	AT	A	G	C	TG	TC	TC	0	G	TC	C	G	A
yo4	C	AG	TC	G	ATGC	C	AT	AG	A	G	G	T	0	C	A	G	A	C	0	C	G	0	G	C	0	G	C	G	C	G	C	G	C	C	T	C	T	G	G	A	TG	C	C	A	G	C	TC	G	AC
nt1	TC	AG	C	G	AT	C	AT	AG	A	G	G	TC	G	C	A	G	A	C	C	C	GC	G	G	C	0	G	0	G	C	GC	C	G	C	C	C	C	AT	A	G	C	TG	T	C	A	G	C	C	G	C
nt2	C	G	C	G	ATC	C	A	G	A	G	0	T	G	C	A	G	A	C	C	C	G	0	G	C	0	G	0	G	C	GC	C	G	C	C	C	AC	A	AG	G	C	TG	TC	TC	A	G	C	C	G	A
nt3	C	AG	TC	G	G	0	AT	A	A	G	G	TC	G	C	A	G	A	C	C	0	0	G	G	C	0	G	0	G	C	GC	C	G	C	C	C	0	T	A	G	0	TG	C	C	AG	G	C	C	G	C
nt4	TC	AG	TC	G	ATG	C	A	AG	A	G	0	T	G	C	A	G	A	C	C	C	G	G	G	C	0	GC	C	G	C	GC	C	G	C	C	C	C	A	A	G	0	TG	C	C	A	G	TC	C	0	0
nt5	C	G	C	G	ATGC	C	A	G	A	G	G	T	G	C	A	G	A	0	C	C	G	G	G	C	0	G	C	G	C	C	C	G	C	C	C	0	A	AG	G	A	G	T	C	A	G	C	C	G	A
mo2	TC	0	0	0	0	0	0	0	0	0	0	0	0	0	0	0	0	TC	0	0	0	0	0	0	0	0	C	0	0	0	0	0	0	0	0	0	0	0	0	0	0	0	T	0	0	0	0	0	A
mo3	TC	AG	TC	G	ATGC	AC	AT	A	AT	G	G	T	G	C	A	G	A	C	C	C	G	G	G	C	0	G	C	G	C	GC	C	G	C	C	C	C	A	A	G	A	TG	TC	TC	A	G	C	C	G	A
mo4	T	A	T	0	TGC	AC	T	A	AT	G	G	T	G	C	A	G	A	C	C	C	G	G	G	C	0	0	C	G	C	C	C	G	C	C	C	C	A	AG	G	A	G	T	T	A	G	C	C	TG	A
lb1	0	A	0	A	0	0	0	0	0	G	0	T	0	0	0	0	0	0	0	C	G	0	0	0	C	0	0	G	C	0	0	0	0	0	0	0	0	0	T	0	0	0	T	A	0	0	C	0	A
mb1	0	0	0	0	0	0	0	0	0	0	0	0	0	0	0	0	0	0	0	0	0	0	0	0	0	0	0	0	0	0	0	0	0	0	0	0	0	0	0	0	0	0	0	0	0	0	0	0	0
c4	T	A	TG	A	T	C	T	AC	A	G	0	0	0	0	0	0	0	0	0	0	0	0	0	0	0	0	0	0	0	0	0	0	0	0	0	0	0	0	0	0	0	0	0	0	0	0	0	0	0
c5	T	A	T	A	T	C	T	A	A	TG	0	0	0	0	0	0	0	0	0	0	0	0	0	0	0	0	0	0	0	0	0	0	0	0	0	0	0	0	0	0	0	0	0	0	0	0	0	0	0
c6	T	0	T	A	C	AC	0	A	A	G	0	0	G	0	A	0	0	0	C	0	0	G	0	0	0	0	C	G	0	GC	0	0	0	C	C	0	0	0	G	C	G	0	0	A	GC	C	C	G	C
c7	0	0	0	0	0	0	0	A	0	0	G	0	G	0	A	0	A	0	C	0	G	G	G	C	0	0	0	0	0	0	C	0	C	0	0	C	0	0	0	0	0	0	0	0	0	0	0	0	0
c8	0	0	0	0	T	0	T	A	A	0	0	0	0	0	0	0	0	0	0	C	0	0	0	C	0	0	0	0	0	0	C	0	C	C	0	C	0	0	G	C	T	0	0	0	TG	0	0	0	0
c9	T	A	AT	A	C	A	AT	A	A	G	G	T	G	C	A	G	A	TC	C	C	0	G	G	C	C	GC	C	G	C	GC	C	G	TC	C	C	TC	A	AG	G	0	0	T	C	AC	AG	C	TC	G	A
c11	T	A	0	A	T	C	T	A	A	G	G	T	G	C	A	G	A	TC	C	C	G	TG	AG	AC	C	AGC	TC	G	C	C	C	AG	C	C	C	C	A	G	G	C	0	T	TC	C	G	C	T	G	0
c12	AT	A	T	A	0	C	T	A	A	G	G	T	G	C	A	G	A	TC	C	C	G	G	G	C	C	GC	C	G	C	GC	C	G	C	C	C	C	A	G	G	C	G	T	C	AC	G	C	TC	0	A
c13	T	0	0	0	T	C	T	0	A	G	G	T	0	C	A	0	0	C	C	C	G	0	G	C	C	0	C	G	C	GC	C	G	C	C	C	C	A	A	G	0	G	TC	C	0	G	C	0	G	C
c14	T	A	T	A	0	0	T	0	A	G	0	T	G	C	A	G	A	C	C	C	G	G	G	AC	0	G	C	G	C	GC	C	G	C	C	C	C	A	G	G	A	G	T	TC	0	G	0	C	G	A
c15	T	A	T	A	T	0	T	A	A	G	G	T	G	0	A	0	A	C	C	C	G	G	0	C	C	G	C	G	C	C	C	G	C	0	0	0	A	G	G	AC	G	T	TC	C	G	C	TC	T	A
c16	T	A	T	A	0	0	0	A	0	G	0	T	G	C	A	G	A	C	C	C	G	G	G	C	C	G	C	G	C	C	0	G	C	C	C	C	A	G	G	C	G	T	C	C	G	T	0	G	A
c17	T	A	T	A	T	A	T	A	AT	TG	G	T	G	C	A	AG	A	C	C	C	G	G	G	C	C	C	C	G	C	C	C	G	C	TC	C	C	A	AG	TG	A	G	TC	TC	AC	G	C	C	T	AC
c18	T	0	0	A	0	C	T	A	A	G	0	T	G	C	A	0	0	0	C	0	G	G	0	C	0	0	C	0	C	TC	C	G	C	C	0	A	A	0	TG	0	G	T	C	AC	G	C	0	0	0
c19	T	A	0	0	0	C	0	0	A	G	G	0	0	C	A	G	A	C	C	0	0	G	0	C	0	G	0	G	0	0	C	G	C	C	0	0	0	0	G	0	G	T	C	C	G	C	C	0	0
c20	0	0	0	0	0	0	T	0	0	0	G	0	0	0	0	0	0	C	0	0	0	0	0	0	0	0	C	0	0	C	0	0	0	0	0	0	0	0	0	0	0	0	T	0	0	0	0	0	C
c21	T	A	T	A	TC	TC	T	A	T	G	G	C	G	C	A	G	A	0	C	0	G	G	G	C	0	AG	C	G	C	C	C	G	C	C	C	A	A	0	TG	C	TG	TC	C	A	G	C	C	TG	0
c22	T	A	0	0	0	0	T	A	A	G	0	0	0	C	A	G	0	C	C	0	G	G	0	C	C	G	0	0	C	C	C	0	C	C	0	0	A	0	0	0	0	0	0	0	G	C	0	0	0
c23	0	A	T	A	T	C	T	A	A	G	G	T	G	C	A	G	A	C	C	C	G	G	AG	C	C	G	C	G	C	GC	C	AG	C	C	C	C	A	AG	G	A	TG	TC	C	C	G	TC	C	T	AC
c24	T	A	0	0	0	A	T	A	AT	G	G	T	G	C	A	G	A	C	C	C	G	G	G	C	0	G	C	G	C	C	C	G	C	C	C	0	A	G	G	0	TG	0	0	C	G	C	T	0	0
c25	0	0	0	A	0	0	0	0	0	0	0	T	G	C	0	0	A	0	0	0	G	0	G	C	0	G	C	0	C	C	0	0	C	0	0	0	0	0	G	C	G	T	T	A	0	0	C	0	C
c26	0	A	0	0	0	0	0	A	0	G	0	0	0	AC	0	G	0	0	0	C	0	0	0	C	0	0	C	0	C	T	0	G	0	T	0	C	0	0	0	0	0	0	0	0	0	C	T	0	0
c27	T	A	0	A	0	0	T	A	A	G	G	T	0	TC	A	G	A	C	C	C	G	G	AG	C	0	G	C	TG	C	GC	C	G	C	C	C	GC	A	AG	G	C	TG	0	C	ATC	AG	C	TC	0	A
dc1	T	A	T	A	T	C	T	AT	A	G	G	T	G	C	A	G	A	C	C	C	G	G	G	C	C	G	C	G	C	GC	C	G	C	C	C	C	A	A	G	AC	TG	TC	T	A	G	C	C	G	A
dc2	T	A	T	A	T	C	T	A	A	G	G	T	G	C	A	G	A	C	C	AC	G	G	G	C	0	GC	C	G	C	GC	C	G	C	C	C	C	0	0	G	AC	TG	TC	C	0	G	AC	TGC	TG	AC
dc3	T	A	T	AG	T	C	T	A	A	G	G	0	G	C	A	G	A	C	C	C	G	G	G	C	0	G	C	G	C	GC	C	G	C	C	0	C	A	AG	G	AC	TG	TC	C	AC	G	C	TC	TG	AC
dg1	0	0	0	A	TGC	0	0	0	0	0	0	0	0	0	0	0	0	0	ATGC	ATGC	0	0	0	ATGC	A	0	0	0	0	0	0	0	0	0	0	0	0	0	0	ATGC	0	0	0	0	0	0	0	0	0
dg2	0	0	0	0	0	0	0	0	0	0	0	0	0	0	0	0	0	0	ATGC	ATGC	0	0	0	ATGC	0	0	0	0	0	0	0	0	0	0	0	0	0	0	0	ATGC	0	0	0	0	0	0	0	0	0
in4	C	AG	TC	A	T	C	AT	AG	A	G	0	0	0	C	0	G	A	C	C	0	0	0	G	C	0	G	C	G	C	C	0	0	C	0	0	G	A	G	G	AC	T	0	T	0	G	C	C	G	0
in5	T	A	0	A	T	C	T	A	AT	G	G	0	G	0	0	G	A	C	C	C	0	0	G	C	0	G	0	G	C	C	0	0	C	0	0	C	0	AG	G	C	TG	C	C	A	G	C	TC	G	0
in7	T	A	T	A	ATGC	C	AT	A	A	G	G	T	G	C	A	G	A	C	C	C	0	0	G	C	0	GC	C	G	C	GC	0	G	C	C	C	C	A	AG	G	C	G	T	TC	AC	G	C	TC	G	A
in8	T	A	T	A	ATC	AC	T	A	AT	G	G	T	G	C	A	G	A	C	C	0	G	G	G	C	C	G	C	G	C	GC	C	G	C	C	C	C	A	AG	G	AC	TG	TC	C	AC	G	C	C	G	AC
in9	T	A	T	A	ATC	AC	T	A	AT	G	G	T	G	C	A	G	A	C	C	C	G	G	G	C	0	G	0	G	C	C	C	G	C	C	C	0	A	G	TG	AC	G	T	TC	C	G	TC	C	TG	A
mg1	T	0	0	0	0	0	T	0	A	0	G	0	0	0	0	0	0	C	C	C	G	0	0	0	0	G	0	G	0	C	C	0	C	C	0	0	0	0	0	0	0	0	C	0	0	0	0	0	AC
ne10m	T	0	0	0	T	C	0	0	A	0	0	0	0	C	0	0	A	C	0	0	0	0	G	C	C	0	C	G	0	C	0	0	0	0	0	0	0	0	0	C	0	0	0	0	0	0	0	0	C
ne2	T	0	T	A	T	C	T	A	A	G	G	T	G	0	0	0	A	C	C	C	G	G	G	C	C	G	C	G	0	C	0	G	0	C	0	0	0	G	0	A	G	T	C	0	0	C	C	0	0
ne3	T	0	0	0	T	C	T	A	A	G	G	T	0	C	A	G	A	C	C	C	0	0	G	C	C	G	C	G	C	C	0	G	C	0	0	C	A	G	0	AC	G	T	C	0	G	0	C	T	A
ne5	TC	0	T	A	AT	C	T	A	A	G	G	T	G	C	A	G	0	C	C	0	G	G	G	C	C	C	C	G	C	GC	0	0	C	C	C	C	A	AG	G	AC	G	C	T	0	G	C	C	TG	AC
ne9m	T	0	0	0	T	C	0	A	A	0	G	0	0	0	A	0	A	C	0	0	0	0	0	0	0	0	C	0	0	0	C	0	0	0	C	C	0	G	0	C	0	A	TC	0	0	0	C	0	0
ja1	T	A	T	A	T	C	T	A	A	G	G	T	G	C	A	G	A	C	C	C	G	G	G	C	0	G	0	AG	C	C	C	G	C	C	C	C	A	AG	T	A	TG	TC	TC	AC	G	TC	C	0	AC
ja2	T	A	T	A	T	C	T	A	A	G	G	T	G	0	A	0	0	0	C	0	G	G	G	C	0	G	C	G	C	C	0	G	0	0	0	C	A	0	T	0	0	0	0	0	0	0	C	0	0
jm1	0	0	0	0	0	0	0	0	0	0	0	0	0	0	0	0	0	0	ATGC	ATGC	0	0	0	ATGC	0	0	0	0	0	0	0	0	0	0	0	0	0	0	0	ATGC	0	0	0	0	0	0	0	0	0
jm2	0	0	0	0	0	0	0	0	0	0	0	0	0	0	0	0	0	0	ATGC	ATGC	0	0	0	ATGC	C	0	0	0	G	0	0	0	0	0	C	0	0	0	0	ATGC	0	0	0	0	0	0	0	0	0
pa4	T	A	T	A	TC	AC	T	A	AT	G	0	0	0	0	0	0	0	0	0	0	0	0	0	0	0	0	0	0	0	0	0	0	0	0	0	0	0	0	0	0	0	0	0	0	0	0	0	0	0
pa5	T	A	T	A	TC	AC	T	A	AT	G	0	0	0	0	0	0	0	0	0	0	0	0	0	0	0	0	0	0	0	0	0	0	0	0	0	0	0	0	0	0	0	0	0	0	0	0	0	0	0
pa6	T	A	T	A	ATC	AC	T	A	AT	G	0	0	0	0	0	0	0	0	ATGC	ATGC	0	0	0	ATGC	0	0	0	0	0	0	0	0	0	0	0	0	AT	AG	TG	ATGC	T	TC	C	A	G	C	C	TG	C
sr1	T	AG	T	AG	ATGC	AC	T	A	AT	G	G	T	G	C	A	G	A	C	ATGC	ATGC	G	G	G	ATGC	0	GC	C	G	C	GC	C	G	C	C	C	C	AT	AG	G	ATGC	TG	TC	TC	AC	G	C	TC	G	AC
sr2	T	A	T	A	TC	C	T	AG	AT	G	G	T	G	C	AG	G	A	C	C	C	G	G	G	C	C	G	C	G	C	C	C	G	C	C	C	C	AT	AG	TG	AC	TG	TC	TC	AC	G	C	TC	TG	A
sr3	T	A	T	A	T	C	T	A	A	G	G	T	G	C	0	G	A	C	C	C	G	G	G	C	0	G	C	G	C	C	C	G	C	C	0	C	AT	G	G	AC	TG	C	C	AC	G	C	T	G	AC
kz1	T	A	T	A	ATG	C	T	A	A	G	G	T	G	C	A	G	A	C	ATGC	ATGC	G	G	G	ATGC	0	G	C	AG	C	C	C	G	C	C	C	C	A	AG	G	ATGC	G	T	TC	0	G	C	C	G	0
kz2	T	A	T	A	AT	C	T	A	A	G	0	0	0	0	0	0	0	0	0	0	0	0	0	0	0	0	0	0	0	0	0	0	0	0	0	0	A	G	G	A	AG	T	TC	C	G	C	C	G	A
kz3	T	A	T	A	ATGC	AC	T	A	AT	G	0	0	0	0	0	0	0	0	0	0	0	0	0	0	0	0	0	0	0	0	0	0	0	0	0	0	A	A	G	A	G	T	TC	A	G	C	C	G	A
cz1	T	A	T	A	T	C	T	A	A	G	G	T	G	C	A	G	A	C	C	C	G	AG	G	C	C	G	C	G	C	G	0	G	C	TC	C	C	0	A	T	A	T	C	0	A	AG	C	C	T	C
de2	0	0	0	AG	0	C	T	0	0	G	0	0	0	0	0	0	A	0	0	0	0	G	0	0	0	0	0	0	C	0	0	G	0	0	0	0	0	A	G	0	G	T	0	0	G	0	C	G	0
de3	C	0	C	G	T	AC	A	G	A	G	G	T	G	C	0	G	A	C	C	C	G	G	G	C	0	G	0	G	C	C	C	G	C	C	C	C	A	A	0	AC	G	T	C	A	G	C	AC	G	C
de4	0	0	0	0	0	C	T	0	0	G	0	0	0	0	0	0	A	0	0	0	0	G	0	0	0	0	0	0	C	0	0	0	0	0	0	0	0	0	0	0	0	0	0	0	0	0	0	0	0
de5	C	G	C	G	T	C	A	G	A	G	0	T	G	C	A	G	A	C	C	C	G	G	G	AC	0	G	C	G	C	C	T	G	TC	C	C	C	A	A	G	AC	G	T	C	A	G	C	C	TG	TC
dep	C	G	C	G	T	C	A	G	A	G	G	T	G	C	0	G	A	C	0	C	G	G	0	AC	0	G	C	G	C	C	TC	G	TC	C	C	C	A	A	G	TC	G	T	C	A	G	C	C	G	TC
fi1	T	A	T	A	TC	C	AT	0	AT	G	0	T	G	C	A	G	A	C	C	C	G	G	AG	C	0	G	C	G	C	C	C	G	0	0	C	C	A	AG	G	AC	TGC	TC	T	AC	G	C	ATC	G	AC
fi2	T	A	T	AG	T	C	T	AG	AT	G	G	T	G	C	A	G	A	C	C	C	G	G	G	C	0	G	C	G	C	G	C	G	C	C	C	C	A	AG	T	A	G	T	TC	AC	G	C	C	T	AC
fi3	TC	AG	TC	AG	TC	AC	AT	AG	AT	G	0	T	0	C	0	G	A	C	C	C	0	G	G	C	0	G	C	0	C	GC	C	GC	C	C	C	0	AC	AG	TG	A	G	T	TC	AC	G	C	C	TG	AC
ge1	T	0	0	0	0	0	0	0	0	G	G	T	0	0	0	0	A	0	0	AC	AG	0	G	C	0	G	C	G	0	0	C	G	C	C	C	C	0	A	0	0	0	TC	0	A	0	0	C	0	0
ge1n	TC	AG	TC	ATG	AT	C	AT	AG	A	G	G	T	G	C	A	AG	A	C	C	C	G	G	AG	C	0	G	C	G	C	GC	AC	G	C	C	C	C	A	A	TG	A	TG	TC	T	A	G	C	C	0	AC
z1	T	A	T	A	ATGC	A	T	A	T	G	G	T	G	C	A	G	A	C	ATGC	ATGC	G	G	G	ATG	0	G	C	G	C	C	TC	AG	C	C	C	C	A	AG	G	ATGC	G	T	T	AC	G	C	C	TG	A
z2	T	A	T	A	TC	AC	T	A	AT	G	G	0	G	C	A	G	A	C	C	C	G	G	AG	C	0	G	C	G	C	GC	TC	G	C	C	C	C	A	G	TG	A	G	T	TC	TC	G	C	C	G	A
z3	T	A	T	A	ATGC	C	T	A	A	G	G	T	G	C	A	AG	A	C	C	C	G	G	G	C	0	G	TC	G	C	G	C	G	C	C	GC	C	AT	G	TG	A	TG	TC	TC	AC	G	AC	C	TG	A
z4	0	0	0	A	AC	0	T	A	T	G	G	0	G	C	0	G	0	0	C	C	0	0	0	0	0	0	0	G	C	C	0	0	0	C	0	0	T	0	G	C	T	0	0	0	0	C	C	0	C
z5	T	AG	C	AG	TG	C	AT	G	A	G	0	0	G	C	A	G	A	0	C	0	0	G	G	TC	0	0	0	G	C	GC	C	G	TC	C	C	C	A	A	G	A	TG	0	T	0	G	C	C	T	0
z6	T	A	T	A	TC	A	T	A	T	G	G	0	G	C	A	G	A	C	C	0	G	0	G	TC	T	G	0	G	TC	GC	C	G	C	C	C	0	A	0	G	A	TG	TC	C	AC	G	0	TC	G	A
la1	T	A	T	A	TC	AC	T	A	AT	G	0	0	0	0	0	0	0	0	0	0	0	0	0	0	0	0	0	0	0	0	0	0	0	0	0	C	0	0	0	0	0	0	0	0	0	0	0	0	0
nd1	0	0	0	G	AT	0	0	0	0	0	0	0	AG	0	0	0	0	0	0	0	0	0	G	0	0	0	0	0	0	0	0	0	0	0	0	0	0	A	0	0	0	T	0	A	0	0	0	0	C
nd1n	0	0	0	0	0	0	0	0	0	0	0	0	0	0	0	0	0	0	0	0	0	0	0	0	G	0	0	0	0	0	0	0	0	0	0	0	0	0	0	0	0	0	0	0	0	0	0	0	0
nd10	0	0	0	0	0	0	0	0	0	0	0	0	0	0	0	0	0	0	0	0	0	0	0	0	0	0	0	0	0	0	0	0	0	0	0	0	0	0	0	0	0	0	0	0	0	0	0	0	0
nd11	0	0	0	G	0	C	0	0	0	G	0	0	0	0	0	A	0	0	0	0	0	0	0	0	0	0	0	0	0	0	0	0	0	0	0	0	0	0	0	0	0	0	0	0	0	0	0	0	0
nd2	0	0	0	0	0	0	0	0	0	0	0	0	0	0	0	0	0	0	0	0	0	0	0	0	0	0	0	0	0	0	0	0	0	0	0	0	0	0	G	0	0	0	0	0	0	0	0	0	0
nd3	0	0	0	0	0	0	0	0	0	0	0	0	0	0	0	0	0	0	0	0	0	0	0	0	0	0	0	0	0	0	0	0	0	0	0	0	0	0	0	0	0	0	0	0	0	0	0	0	0
nd4n	C	A	T	G	T	C	T	A	A	G	G	T	G	C	A	G	A	TC	C	C	G	G	G	C	C	G	C	G	C	G	C	G	C	C	C	C	A	A	G	C	G	T	TC	A	G	C	C	G	C
nd5n	0	0	0	0	0	0	T	0	A	G	0	T	0	C	0	0	A	T	C	0	G	0	G	C	0	G	0	0	0	0	C	G	C	C	C	0	0	A	0	0	0	T	0	0	G	C	0	0	0
nd6	0	0	0	0	0	0	0	0	0	0	0	0	0	0	0	0	0	0	0	0	0	0	0	0	0	0	0	0	0	0	0	0	0	0	0	0	0	0	0	0	0	0	0	0	0	0	0	0	0
nd7	0	0	0	0	0	0	0	0	0	0	0	0	0	0	0	0	0	0	0	0	0	0	0	0	0	0	0	0	0	0	0	0	0	0	0	0	0	0	0	0	0	0	0	0	0	0	C	0	0
nd8	0	A	0	G	T	C	T	A	A	G	G	0	G	C	A	G	0	C	C	C	0	G	G	C	C	G	C	G	C	G	0	G	C	C	C	0	0	A	0	C	G	T	0	A	0	C	C	G	0
nd9	0	0	0	G	T	0	0	0	0	0	0	0	0	0	0	0	0	C	0	0	0	0	G	0	0	0	0	0	0	0	C	0	0	0	0	0	0	0	0	0	0	0	0	0	0	0	T	0	0
sp1	0	A	T	A	C	C	T	A	AT	G	G	0	G	C	A	G	AC	C	ATGC	ATGC	G	0	GC	ATGC	0	G	C	G	C	G	C	G	C	C	C	0	A	AG	G	ATGC	G	T	T	0	G	C	C	G	A
sp2	T	A	T	A	TC	C	T	A	A	G	G	T	G	C	A	G	A	C	0	C	G	G	G	C	0	G	C	G	C	GC	0	G	C	C	0	AC	A	G	T	A	G	T	C	AC	G	C	C	T	A
sp3	T	A	T	A	T	C	T	A	A	G	G	0	G	C	A	G	A	TC	C	C	G	G	G	C	0	G	C	G	C	C	C	G	C	C	0	C	A	0	G	AC	G	T	C	A	G	C	T	G	A
sp4n	T	A	T	AG	TC	C	T	A	AT	G	G	0	G	C	A	G	A	C	C	C	G	G	G	C	0	G	GC	G	ATC	GC	C	G	C	C	C	C	A	AG	TG	AC	G	TC	TC	AC	G	C	TC	TG	AC
sp5	TC	A	TC	A	TC	C	T	A	AT	G	G	T	G	C	A	AG	A	C	ATGC	ATGC	G	G	G	ATGC	0	G	C	G	C	GC	C	G	C	C	C	C	AT	AG	TG	ATGC	G	TC	T	A	G	C	C	TG	A
sp6	T	0	0	0	0	0	0	0	0	0	0	0	0	0	0	0	0	TC	ATGC	ATGC	0	0	0	ATGC	0	0	C	0	0	0	0	0	0	0	0	0	0	0	0	ATGC	0	0	T	0	0	0	0	0	A
m10	0	0	0	0	ATGC	0	0	0	0	0	0	0	0	0	0	0	0	0	0	0	0	0	0	AG	0	0	0	0	0	0	0	0	0	0	0	0	0	0	0	AGC	0	0	0	0	0	0	0	0	0
m12	0	0	0	0	AT	0	0	0	0	0	0	0	0	0	0	0	0	0	0	0	0	0	0	0	0	0	0	0	0	0	C	0	0	0	0	0	0	0	0	0	0	0	0	0	0	0	0	0	0
m13	0	0	0	0	AT	0	0	0	0	0	0	0	0	0	0	0	0	0	A	0	0	0	0	0	0	0	0	0	0	0	C	0	0	0	0	0	0	0	0	0	0	0	0	0	G	0	0	0	0
m14	0	0	0	0	ATC	0	0	0	0	0	0	0	0	0	0	0	0	0	0	0	0	0	0	0	0	0	0	0	0	0	0	G	0	0	0	0	0	0	0	0	0	0	0	0	G	0	0	0	0
m15	0	0	0	0	AT	0	0	0	0	0	0	0	0	0	0	0	0	0	0	0	0	0	0	0	0	0	0	0	0	0	0	0	0	0	0	0	0	0	0	0	0	0	0	0	G	0	0	0	0
m16	0	0	0	0	AG	0	0	0	0	0	0	0	0	0	0	0	0	0	0	0	0	0	0	0	0	0	0	0	0	0	0	G	0	0	0	0	0	0	0	A	0	0	0	0	G	0	0	0	0
m17	0	0	0	0	ATG	0	0	0	0	0	0	0	0	0	0	0	0	0	0	0	0	0	0	0	0	0	0	0	0	0	C	0	0	0	0	0	0	0	0	0	0	0	0	0	0	0	0	0	0
m1	0	0	0	0	ATG	0	0	0	0	0	0	0	0	0	0	0	0	0	T	0	0	0	0	0	0	0	0	0	0	0	C	0	0	0	0	0	0	0	0	0	0	0	0	0	G	0	0	0	0
m2	0	0	0	0	TG	0	0	0	0	0	0	0	0	0	0	0	0	0	C	0	0	0	0	C	0	0	0	0	0	0	0	G	0	0	0	0	0	0	0	A	0	0	0	0	0	0	0	0	0
m3	0	0	0	0	C	0	0	0	0	0	0	0	0	0	0	0	0	0	0	0	0	0	0	0	0	0	0	0	0	0	0	0	0	0	0	0	0	0	0	0	0	0	0	0	0	0	0	0	0
m4	0	0	0	0	AC	0	0	0	0	0	0	0	0	0	0	0	0	0	0	0	0	0	0	0	0	0	0	0	0	0	0	0	0	0	0	0	0	0	0	0	0	0	0	0	0	0	0	0	0
m5	0	0	0	0	AT	0	0	0	0	0	0	0	0	0	0	0	0	0	0	0	0	0	0	0	0	0	0	0	0	0	0	0	0	0	0	0	0	0	0	A	0	0	0	0	0	0	0	0	0
m6	0	0	0	0	0	0	0	0	0	0	0	0	0	0	0	0	0	0	0	0	0	0	0	0	0	0	0	0	0	0	0	G	0	0	0	0	0	0	0	A	0	0	0	0	G	0	0	0	C
m7	0	0	0	0	G	0	0	0	0	0	0	0	0	0	0	0	0	0	0	0	0	0	0	0	0	0	0	0	0	0	0	G	0	0	0	0	0	0	0	0	0	0	0	0	0	0	0	0	0
m8	0	0	0	0	ATG	0	0	0	0	0	0	0	0	0	0	0	0	0	0	0	0	0	0	0	0	0	0	0	0	0	0	0	0	0	0	0	0	0	0	0	0	0	0	0	G	0	0	0	0
m9	0	0	0	0	A	0	0	0	0	0	0	0	0	0	0	0	0	0	0	0	0	0	0	0	0	0	0	0	0	0	0	0	0	0	0	0	0	0	0	0	0	0	0	0	0	0	0	0	0
km1	0	0	0	0	0	0	0	0	0	0	0	0	0	0	0	0	0	0	0	0	0	0	0	0	0	0	0	0	0	0	0	0	0	0	0	0	0	0	0	0	0	0	0	0	0	C	0	0	0
sc1	0	A	0	0	T	0	0	0	0	0	0	0	0	0	0	0	0	0	0	0	0	0	0	0	0	0	0	0	0	0	0	0	0	0	0	0	0	0	0	0	0	0	0	0	0	0	0	0	0
us1	T	A	T	A	T	C	T	A	A	G	G	T	G	C	0	G	A	C	C	C	G	G	G	C	C	GC	C	0	C	0	C	G	C	C	C	C	A	G	G	A	0	0	C	C	G	C	0	G	A
us2	0	0	0	0	0	0	0	0	0	0	G	T	G	C	0	0	0	C	C	C	G	G	G	C	0	0	C	0	C	C	0	G	C	0	0	TC	A	0	0	0	0	0	0	0	0	0	C	T	0
so3	T	A	T	A	ATGC	C	T	A	A	G	G	T	G	C	A	G	A	C	C	C	G	G	G	C	0	C	C	G	C	GC	C	G	C	C	C	C	A	G	G	C	G	T	C	C	G	C	TC	G	A
so4	T	A	T	A	AT	C	T	A	A	G	0	0	0	0	0	0	0	0	0	0	0	0	0	0	0	0	0	0	0	0	0	0	0	0	0	0	0	0	0	0	0	0	0	0	0	0	0	0	0
so4n	T	A	T	A	ATGC	C	T	A	A	G	G	T	G	C	ATGC	G	A	C	C	C	G	ATGC	G	C	0	G	C	G	C	C	C	ATG	C	C	C	ATGC	A	G	ATGC	A	G	ATGC	ATGC	C	ATGC	ATGC	ATGC	G	ATGC
so5	T	A	T	A	AT	C	T	A	A	G	0	0	0	0	0	0	0	0	0	0	0	0	0	0	0	0	0	0	0	0	0	0	0	0	0	0	A	G	G	C	G	T	C	C	G	C	T	G	A
p1	0	0	0	G	0	0	0	0	A	G	G	0	0	C	0	0	A	G	C	0	0	0	G	C	0	0	C	G	0	0	C	G	T	T	0	T	0	0	0	0	0	0	0	0	G	0	0	0	A
p10	0	0	T	G	T	C	A	A	A	G	0	0	0	C	0	C	0	G	0	0	0	G	G	C	C	G	0	G	0	A	T	G	C	T	0	T	0	A	0	T	T	0	0	A	G	0	C	0	A
p11	0	0	C	G	T	0	A	A	A	G	0	0	0	0	0	C	0	G	C	0	0	G	G	C	C	0	C	G	0	0	C	G	C	T	0	T	0	A	G	0	T	0	0	A	G	0	C	0	A
p12	0	A	T	G	T	C	T	A	0	G	G	T	0	C	G	0	A	0	C	0	G	G	G	C	C	0	C	G	C	0	C	G	0	0	0	T	A	G	G	C	T	T	0	A	G	C	0	0	A
p13	0	0	T	G	0	0	A	A	0	G	G	0	0	C	0	C	0	G	0	0	0	G	0	C	0	G	C	G	0	A	C	G	C	T	0	T	0	A	G	0	T	0	0	A	G	0	C	0	A
p14	0	0	T	G	0	0	A	A	A	G	G	0	0	C	0	C	0	G	C	0	0	G	G	C	0	G	C	G	0	0	C	G	C	T	0	T	0	A	G	0	T	0	0	A	G	0	C	0	A
p15	0	0	0	A	0	0	0	0	A	G	0	0	0	C	0	0	A	G	C	0	0	0	0	C	0	G	C	G	0	0	C	G	T	0	0	T	0	0	G	C	0	0	0	0	G	C	0	0	A
p16	0	0	0	0	T	0	0	0	0	G	0	0	0	0	0	0	0	0	C	0	0	0	0	0	C	G	T	0	0	0	0	A	C	0	0	0	0	0	0	0	0	0	0	0	0	C	0	0	C
p17	0	0	0	G	0	0	0	0	0	0	0	0	0	0	0	0	0	0	0	0	0	0	0	0	C	A	0	0	0	0	C	G	C	0	0	0	0	0	0	0	0	0	0	0	A	C	0	0	A
p18	0	0	T	G	T	0	A	A	A	G	G	0	0	C	0	C	0	G	0	0	G	G	0	C	C	0	0	G	0	A	C	G	C	T	0	T	0	A	0	0	T	0	0	A	0	0	C	0	A
p19	0	0	T	G	T	0	A	A	A	G	G	0	0	0	0	C	0	G	0	0	G	G	0	C	0	G	0	G	0	A	C	G	C	T	0	T	0	A	0	0	T	0	0	A	G	0	0	0	0
p2	0	0	0	G	0	0	0	0	A	0	0	0	0	C	0	0	A	G	0	0	G	0	0	0	C	G	C	G	0	0	C	G	T	0	0	T	0	0	G	0	G	0	0	0	G	0	0	0	A
p20	0	0	T	G	T	C	A	A	A	G	0	0	0	C	0	C	0	G	0	0	0	G	G	C	C	G	0	G	0	A	C	G	C	T	0	T	0	A	0	C	T	0	0	A	G	0	C	0	A
p21	0	A	T	G	T	0	T	A	A	0	G	T	0	C	0	G	A	A	0	0	G	G	G	C	C	0	C	G	0	0	C	G	C	C	0	C	0	0	G	0	T	T	0	A	G	C	C	G	A
p22	0	0	0	G	0	0	A	0	0	G	0	0	0	0	0	0	0	0	0	0	0	0	0	0	0	0	T	0	0	0	C	G	C	0	0	C	0	0	0	0	0	0	0	0	A	C	0	0	A
p23	0	0	T	G	T	0	A	A	A	G	G	0	0	C	0	C	0	G	0	0	G	G	0	C	C	G	0	G	0	A	C	G	C	T	0	T	0	A	0	0	T	0	0	A	0	0	C	0	A
p24	0	0	0	G	0	0	0	0	A	G	G	0	0	C	0	0	A	G	C	0	0	0	G	C	0	0	C	G	0	0	C	G	T	T	0	T	0	0	0	0	0	0	0	0	G	0	0	0	A
p25	0	0	0	0	0	0	0	0	A	0	0	0	0	0	0	0	0	0	0	0	0	0	0	0	C	0	C	0	0	0	C	0	0	0	0	0	0	0	0	0	0	0	0	0	A	0	0	0	A
p26	0	0	T	G	T	C	A	A	A	G	0	0	0	C	0	C	0	G	0	0	0	G	G	C	C	G	0	G	0	A	T	G	C	T	0	T	0	A	0	T	T	0	0	A	G	0	C	0	A
p27	0	0	0	G	0	0	0	0	A	G	0	0	0	C	0	0	0	G	C	0	G	0	0	C	C	G	0	G	0	0	C	G	0	0	0	T	0	0	0	C	G	0	0	0	G	C	0	0	A
p28	0	0	T	G	T	0	A	A	A	G	G	0	0	C	0	C	0	G	0	0	G	G	0	C	0	0	0	G	0	A	C	G	C	T	0	T	0	A	0	0	T	0	0	A	0	0	C	0	A
p29	0	0	T	G	T	C	A	0	A	G	G	0	0	C	0	C	0	G	0	0	G	0	0	C	C	G	0	G	0	A	T	G	C	T	0	T	0	A	0	T	T	0	0	A	G	0	0	0	A
p3	0	0	T	G	T	C	A	0	A	G	G	0	0	C	0	C	0	G	0	0	G	0	0	C	C	G	0	G	0	A	T	G	C	T	0	T	0	A	0	T	T	0	0	A	G	0	0	0	A
p30	0	0	0	0	T	0	0	0	0	0	0	0	0	C	0	0	0	0	0	0	0	0	0	0	0	0	0	0	0	0	0	0	T	C	0	0	0	0	0	0	0	0	0	0	0	C	0	0	C
p31	0	0	C	G	T	0	A	A	A	G	0	0	0	0	0	C	0	G	C	0	0	G	G	C	C	0	C	G	0	0	C	G	C	T	0	T	0	A	G	0	T	0	0	A	G	0	C	0	A
p32	0	0	0	0	T	C	A	A	A	G	G	0	0	C	0	C	0	G	0	0	0	G	G	C	C	G	0	G	0	A	T	G	C	T	0	T	0	A	0	C	T	0	0	0	G	0	0	0	A
p33	0	0	0	G	0	0	0	0	A	0	0	0	0	C	0	0	A	G	0	0	G	0	0	0	C	G	C	G	0	0	C	G	T	0	0	T	0	0	G	0	G	0	0	0	G	0	0	0	A
p4	0	0	0	0	T	C	A	A	A	G	G	0	0	C	0	C	0	G	0	0	0	G	G	C	C	G	0	G	0	A	T	G	C	T	0	T	0	A	0	C	T	0	0	0	G	0	0	0	A
p5	T	A	T	G	T	C	T	A	A	G	G	T	G	C	0	G	A	C	C	0	G	G	A	C	0	G	C	G	C	0	C	G	0	C	C	C	A	A	G	C	G	T	C	A	G	C	C	G	A
pp6	C	G	C	G	T	C	A	G	A	A	G	T	A	C	C	G	A	C	C	C	G	G	G	C	C	G	C	G	C	C	C	G	C	C	C	C	A	A	T	A	TG	TC	T	A	G	C	C	T	AC
p7	0	0	T	G	T	0	A	A	A	G	G	0	0	C	0	C	0	G	0	0	G	G	0	C	0	0	0	G	0	A	C	G	C	T	0	T	0	A	0	0	T	0	0	A	0	0	C	0	A
p8	T	A	T	G	T	C	T	A	A	G	G	T	G	C	0	A	A	C	C	C	G	G	G	C	C	G	C	G	C	0	C	G	C	C	C	C	A	A	G	C	G	T	C	A	G	C	C	G	A
p9	T	A	T	G	T	C	T	A	A	G	G	T	G	C	A	A	A	C	C	C	G	G	G	C	C	G	C	G	C	0	C	G	C	C	C	C	A	G	0	C	G	T	C	A	G	C	C	G	A
bz1	T	A	T	A	T	C	T	A	A	G	G	T	0	C	A	G	A	C	C	C	G	0	G	C	0	GC	C	G	C	C	C	G	C	C	C	C	A	AG	G	AC	G	T	C	C	G	C	C	G	A
ch1	T	A	T	AT	C	A	T	AG	T	G	0	0	0	0	0	0	0	0	0	0	0	0	0	0	0	0	0	0	0	0	0	0	0	0	0	0	0	0	0	0	0	0	0	0	0	0	0	0	0
me1	T	A	T	A	TC	ATC	T	A	AT	G	G	ATC	G	C	A	G	A	TC	C	C	G	G	G	C	C	GC	C	G	C	C	C	TG	C	C	C	C	A	G	G	AT	G	T	C	C	G	C	C	TG	A
ur1	0	0	0	0	0	0	0	0	0	0	0	0	0	0	0	0	0	0	0	0	0	0	0	0	0	0	0	0	0	0	0	0	0	0	0	0	0	G	0	0	0	0	C	0	0	0	0	0	0
ur2	T	0	T	A	0	0	0	0	0	G	0	0	0	0	0	0	0	0	0	0	0	0	0	0	0	0	0	0	0	0	0	0	0	0	0	0	0	0	0	0	0	0	0	0	0	0	0	0	0
pe1	T	A	T	A	C	AC	T	A	A	G	G	T	G	C	A	G	A	C	C	C	G	G	G	C	C	0	C	G	C	GC	C	G	C	C	C	C	AT	G	G	A	G	T	C	0	G	C	TC	G	A
pe2	T	A	T	0	T	C	T	A	A	G	G	T	G	C	A	G	A	C	ATGC	ATGC	G	G	G	ATGC	0	G	C	G	C	GC	C	G	C	C	C	C	A	AG	G	ATGC	TG	T	TC	AC	G	C	TC	G	AC
pe3	T	A	T	A	TGC	0	T	A	AT	G	G	T	G	C	A	G	A	C	ATGC	ATGC	G	G	G	ATGC	0	C	C	G	C	GC	C	G	C	C	C	C	A	AG	G	ATGC	TG	T	TC	AC	0	C	C	TG	AC
so1	0	A	T	A	0	C	T	0	0	G	G	0	0	C	0	G	0	0	ATGC	ATGC	0	0	G	ATGC	0	0	0	0	0	C	0	0	C	C	C	C	A	0	G	ATGC	G	T	C	0	0	0	0	G	0
so2	T	0	T	A	ATC	C	T	A	A	0	0	T	G	C	A	G	A	0	ATGC	ATGC	0	0	G	ATGC	0	0	C	G	C	0	C	0	C	C	0	C	A	G	G	ATGC	G	T	0	0	0	C	0	0	A
so6	T	0	T	0	C	0	T	A	T	G	G	T	G	C	A	G	A	C	C	C	G	G	G	C	0	G	C	G	TC	AGC	C	G	C	TC	C	C	A	G	TG	0	G	T	T	C	G	C	TC	0	A
so7	T	A	T	A	ATGC	A	T	AG	T	G	G	T	G	C	A	G	A	C	ATGC	ATGC	G	G	G	ATGC	0	G	C	G	C	GC	C	G	C	C	C	C	A	G	G	ATGC	AG	T	C	C	G	C	C	T	A
so8	T	0	0	A	0	C	T	A	A	0	0	T	0	C	A	G	0	C	ATGC	ATGC	G	0	G	ATGC	0	0	TC	G	C	0	0	G	0	C	C	C	A	0	0	ATGC	G	T	0	0	0	TC	0	G	0
so9	T	A	T	A	AT	C	T	A	A	G	G	T	G	C	ATGC	G	A	0	C	C	0	ATGC	G	C	0	G	C	G	C	C	C	G	C	C	C	GC	A	G	ATGC	0	G	ATGC	ATGC	C	ATGC	TGC	ATGC	G	ATGC
br1	T	0	0	0	0	C	T	0	0	0	G	0	G	C	0	G	A	TC	0	0	0	G	G	0	0	0	C	G	0	0	0	0	0	0	0	0	A	0	0	C	G	0	0	0	0	0	0	0	AC
my3	T	0	0	0	0	0	0	0	0	0	0	0	0	0	0	G	0	C	0	0	0	0	0	0	0	0	C	0	0	0	0	0	0	0	0	0	0	0	0	A	0	0	0	0	0	0	0	0	A
my6	T	0	0	0	0	0	0	0	0	0	0	0	0	0	0	0	0	0	0	0	0	0	0	0	0	0	C	0	0	0	0	0	0	0	0	0	0	0	0	0	0	0	0	0	0	0	0	0	A
my7	T	0	0	0	0	0	0	0	0	0	0	0	0	0	0	G	0	C	0	0	0	0	0	0	0	0	C	0	0	0	0	0	0	0	0	0	0	0	0	A	0	0	0	0	0	0	0	0	A
ap1	0	0	0	0	0	0	0	0	0	0	0	0	0	0	0	0	0	0	0	0	0	0	0	0	0	0	0	0	0	0	0	0	0	0	0	0	0	0	0	0	0	0	0	0	0	0	0	0	0
cm1	0	0	0	0	0	0	0	0	A	0	0	0	0	C	0	0	0	0	0	0	0	0	0	0	0	0	0	G	0	0	0	0	C	0	0	C	0	0	0	0	0	0	0	0	0	0	0	0	A
cm2	0	0	0	0	0	0	0	0	0	0	0	0	0	GC	0	0	0	0	0	0	0	0	0	0	C	0	0	G	0	0	0	0	C	0	0	C	0	0	0	0	0	0	0	0	0	0	0	0	A
dp1	0	0	0	0	0	0	0	0	0	0	G	0	0	C	0	0	0	0	0	0	G	0	0	C	0	0	0	G	0	0	C	0	C	0	0	0	0	0	0	0	0	0	0	0	G	0	0	0	0
dp2	0	0	0	0	ATC	0	0	0	0	0	0	0	0	0	0	0	0	0	ATGC	ATGC	0	0	0	ATGC	G	0	0	0	0	0	0	G	0	0	0	0	0	0	0	ATGC	0	0	0	0	G	0	0	0	0
dp3n	0	0	0	0	0	0	0	0	A	0	G	0	0	C	0	0	0	0	0	0	G	0	0	C	0	0	0	G	0	0	C	0	C	0	0	0	0	0	0	0	0	0	0	0	G	0	0	0	0
gb1	0	A	0	0	ATGC	0	T	A	0	G	0	0	0	C	G	G	0	0	ATGC	ATGC	G	G	0	ATGC	0	0	0	0	0	0	C	G	C	C	0	0	0	A	G	ATGC	T	0	C	AC	G	0	0	G	A
ha1	0	0	0	0	0	0	0	0	0	0	0	0	0	0	0	0	0	0	0	0	0	0	0	0	0	0	0	0	0	0	0	0	0	0	0	0	0	0	0	0	0	0	0	0	0	0	0	0	0
hu1	0	0	0	0	0	0	0	0	0	0	0	0	0	0	0	0	0	0	0	0	0	0	0	0	0	0	0	0	0	0	0	0	0	0	0	0	0	0	0	0	0	0	0	0	0	0	0	0	0
pr1	0	0	0	0	0	0	0	0	0	0	G	0	0	0	0	0	0	0	0	0	0	0	0	0	0	0	0	0	0	0	0	0	0	0	0	0	0	0	0	0	0	0	0	0	0	0	0	0	0
rr1	0	0	T	0	ATGC	0	A	A	A	G	0	0	0	0	0	C	0	0	ATGC	ATGC	G	G	G	ATGC	0	0	0	G	0	0	C	G	0	T	0	T	0	0	G	ATGC	0	0	0	0	G	0	C	0	0
rr2	0	0	T	0	ATGC	0	A	A	A	G	0	0	0	0	0	C	0	0	ATGC	ATGC	G	G	G	ATGC	0	0	0	G	0	0	C	0	0	T	0	T	0	0	G	ATGC	0	0	0	0	G	0	C	0	0
rt1	0	0	0	0	AT	0	0	0	0	0	0	0	0	0	0	0	0	0	ATGC	ATGC	0	0	0	ATGC	0	0	0	0	0	G	0	G	0	0	0	0	0	0	0	ATGC	0	0	0	0	G	0	0	0	0
rt2	0	0	0	0	AT	0	0	0	0	0	0	0	0	0	0	0	0	0	ATGC	ATGC	0	0	0	ATGC	G	0	0	0	G	0	0	G	0	0	0	0	0	0	0	ATGC	0	0	0	0	G	0	0	0	0
rt3	0	0	0	0	AT	0	0	0	0	0	0	0	0	0	0	0	0	0	ATGC	ATGC	0	0	0	ATGC	0	0	0	0	0	0	0	G	0	0	0	0	0	0	0	ATGC	0	0	0	0	G	0	0	0	0
su1	0	0	0	0	ATG	0	AT	0	0	0	0	0	0	0	0	0	0	0	ATGC	ATGC	0	0	0	ATGC	0	0	0	0	0	0	0	G	0	0	0	0	0	0	0	ATGC	0	0	0	0	G	0	0	0	0
b10	0	0	0	0	TG	0	0	0	0	0	0	0	0	0	0	0	0	0	0	0	0	0	0	0	0	0	0	0	0	0	0	0	0	0	0	0	0	0	0	0	0	0	0	0	0	0	0	0	0
b11	0	0	0	0	A	0	0	0	0	0	0	0	0	0	0	0	0	0	0	0	0	0	0	0	0	0	0	0	0	0	0	0	0	0	0	0	0	0	0	0	0	0	0	0	0	0	0	0	0
b12	0	0	0	0	AT	0	0	0	0	0	0	0	0	0	0	0	0	0	0	0	0	0	0	0	0	0	0	0	0	0	0	0	0	0	0	0	0	0	0	0	0	0	0	0	0	0	0	0	0
b13	0	0	0	0	0	0	0	0	0	0	0	0	0	0	0	0	0	0	0	0	0	0	0	0	0	0	0	0	0	0	0	0	0	0	0	0	0	0	0	0	0	0	0	0	0	0	0	0	0
b14	0	0	0	0	0	0	0	0	0	0	0	0	0	0	0	0	0	0	C	0	0	0	0	0	0	0	0	0	0	0	0	0	0	0	0	0	0	0	0	0	0	0	0	0	0	0	0	0	0
b15	0	0	0	0	AC	0	0	0	0	0	0	0	0	0	0	0	0	0	0	0	0	0	0	0	0	0	0	0	0	0	0	0	0	0	0	0	0	0	0	0	0	0	0	0	0	0	0	0	0
b16	0	0	0	0	0	0	0	0	0	0	0	0	0	0	0	0	0	0	0	0	0	0	0	0	0	0	0	0	0	0	0	0	0	0	0	0	0	0	0	0	0	0	0	0	0	0	0	0	0
b17	0	0	0	0	T	0	0	0	0	0	0	0	0	0	0	0	0	0	0	0	0	0	0	0	0	0	0	0	0	0	0	0	0	0	0	0	0	0	0	0	0	0	0	0	0	0	0	0	0
b18	0	0	0	0	AT	0	0	0	0	0	0	0	0	0	0	0	0	0	0	0	0	0	0	0	0	0	0	0	0	0	0	0	0	0	0	0	0	0	0	0	0	0	0	0	0	0	0	0	0
b19	0	0	0	0	0	0	0	0	0	0	0	0	0	0	0	0	0	0	0	0	0	0	0	0	0	0	0	0	0	0	0	0	0	0	0	0	0	0	0	0	0	0	0	0	0	0	0	0	0
b1	0	0	0	G	0	0	0	0	0	0	0	0	0	0	0	0	0	0	0	0	0	0	0	0	0	0	0	0	0	0	0	0	0	0	0	0	0	0	0	0	0	0	0	0	0	0	0	0	0
b20	0	0	0	0	T	0	0	0	0	0	0	0	0	0	0	0	0	0	0	0	0	0	0	0	0	0	0	0	0	0	0	0	0	0	0	0	0	0	0	0	0	0	0	0	0	0	0	0	0
b21	0	0	0	0	0	0	0	0	0	0	0	0	0	0	0	0	0	0	0	0	0	0	0	0	0	0	0	0	0	0	0	0	0	0	0	0	0	0	0	C	0	0	0	0	0	0	0	0	0
b22	0	0	0	0	A	0	0	0	0	0	0	0	0	0	0	0	0	0	0	0	0	0	0	0	0	0	0	0	0	0	0	0	0	0	0	0	0	0	0	0	0	0	0	0	0	0	0	0	0
b23	0	0	0	0	0	0	0	0	0	0	0	0	0	0	0	0	0	0	0	0	0	0	0	0	0	0	0	0	0	0	0	0	0	0	0	0	0	0	0	0	0	0	0	0	0	0	0	0	0
b24	0	0	0	0	T	0	0	0	0	0	0	0	0	0	0	0	0	0	0	0	0	0	0	0	0	0	0	0	0	0	0	0	0	0	0	0	0	0	0	0	0	0	0	0	0	0	0	0	0
b25	0	0	0	0	0	0	0	0	0	0	0	0	0	0	0	0	0	0	0	0	0	0	0	0	0	0	0	0	0	0	0	0	0	0	0	0	0	0	0	0	0	0	0	0	0	0	0	0	0
b26	0	0	0	0	0	0	0	0	0	0	0	0	0	0	0	0	0	0	C	0	0	0	0	0	0	0	0	0	0	0	0	0	0	0	0	0	0	0	0	0	0	0	0	0	0	0	0	0	0
b27	0	0	0	0	0	0	0	0	0	0	0	0	0	0	0	0	0	0	0	0	0	0	0	0	0	0	0	0	0	0	0	0	0	0	0	0	0	0	0	0	0	0	0	0	0	0	0	0	0
b28	0	0	0	0	0	0	0	0	0	0	0	0	0	0	0	0	0	0	0	0	0	0	0	0	0	0	0	0	0	0	0	0	0	0	0	0	0	0	0	0	0	0	0	0	0	0	0	0	0
b29	0	0	0	0	0	0	0	0	0	0	0	0	0	0	0	0	0	0	0	0	0	0	0	0	0	0	0	0	0	0	0	0	0	0	0	0	0	0	0	0	0	0	0	0	0	0	0	0	0
b2	0	0	0	0	T	0	0	0	0	0	0	0	0	0	0	0	0	0	0	0	0	0	0	0	0	0	0	0	0	0	0	0	0	0	0	0	0	0	0	0	0	0	0	0	0	0	0	0	0
b30	0	0	0	0	AC	0	0	0	0	0	0	0	0	0	0	0	0	0	0	0	0	0	0	0	0	0	0	0	0	0	0	0	0	0	0	0	0	0	0	0	0	0	0	0	0	0	0	0	0
b31	0	0	0	0	0	0	0	0	0	0	0	0	0	0	0	0	0	0	0	0	0	0	0	0	0	0	0	0	0	0	0	0	0	0	0	0	0	0	0	0	0	0	0	0	0	0	0	0	0
b32	0	0	0	0	A	0	0	0	0	0	0	0	0	0	0	0	0	0	0	0	0	0	0	0	0	0	0	0	0	0	0	0	0	0	0	0	0	0	0	0	0	0	0	0	0	0	0	0	0
b33	0	0	0	0	0	0	0	0	0	0	0	0	0	0	0	0	0	0	0	0	0	0	0	0	0	0	0	0	0	0	0	0	0	0	0	0	0	0	0	0	0	0	0	0	0	0	0	0	0
b34	0	0	0	0	0	0	0	0	0	0	0	0	0	0	0	0	0	0	0	0	0	0	0	0	0	0	0	0	0	0	0	0	0	0	0	0	0	0	0	0	0	0	0	0	0	0	0	0	0
b35	0	0	0	0	0	0	0	0	0	0	0	0	0	0	0	0	0	0	0	0	0	0	0	0	0	0	0	0	0	0	0	0	0	0	0	0	0	0	0	0	0	0	0	0	0	0	0	0	0
b36	0	0	0	0	0	0	0	0	0	0	0	0	0	0	0	0	0	0	A	0	0	0	0	0	0	0	0	0	0	0	0	0	0	0	0	0	0	0	0	0	0	0	0	0	0	0	0	0	0
b37	0	0	0	0	0	0	0	0	0	0	0	0	0	0	0	0	0	0	0	0	0	0	0	0	0	0	0	0	0	0	0	0	0	0	0	0	0	0	0	0	0	0	0	0	0	0	0	0	0
b38	0	0	0	0	0	0	0	0	0	0	0	0	0	0	0	0	0	0	0	0	0	0	0	0	0	0	0	0	0	0	0	0	0	0	0	0	0	0	0	0	0	0	0	0	0	0	0	0	0
b39	0	0	0	0	0	0	0	0	0	0	0	0	0	0	0	0	0	0	0	0	0	0	0	0	0	0	0	0	0	0	0	0	0	0	0	0	0	0	0	0	0	0	0	0	0	0	0	0	0
b3	0	0	0	0	AT	0	0	0	0	0	0	0	0	0	0	0	0	0	T	T	0	0	0	0	0	0	0	0	0	0	0	0	0	0	0	0	0	0	0	0	0	0	0	0	0	0	0	0	0
b40	0	0	0	0	0	0	0	0	0	0	0	0	0	0	0	0	0	0	0	0	0	0	0	0	0	0	0	0	0	0	0	0	0	0	0	0	0	0	0	0	0	0	0	0	0	0	0	0	0
b42	0	0	0	0	AT	0	0	0	0	0	0	0	0	0	0	0	0	0	0	0	0	0	0	0	0	0	0	0	0	0	0	0	0	0	0	0	0	0	0	0	0	0	0	0	0	0	0	0	0
b43	0	0	0	0	0	0	0	0	0	0	0	0	0	0	0	0	0	0	0	0	0	0	0	0	0	0	0	0	0	0	0	0	0	0	0	0	0	0	0	0	0	0	0	0	0	0	0	0	0
b44	0	0	0	0	T	0	0	0	0	0	0	0	0	0	0	0	0	0	0	0	0	0	0	0	0	0	0	0	0	0	0	0	0	0	0	0	0	0	0	0	0	0	0	0	0	0	0	0	0
b45	0	0	0	0	T	0	0	0	0	0	0	0	0	0	0	0	0	0	0	0	0	0	0	0	0	0	0	0	0	0	0	0	0	0	0	0	0	0	0	0	0	0	0	0	0	0	0	0	0
b46	0	0	0	0	0	0	0	0	0	0	0	0	0	0	0	0	0	0	0	0	0	0	0	0	0	0	0	0	0	0	0	0	0	0	0	0	0	0	0	0	0	0	0	0	0	0	0	0	0
b47	0	0	0	0	0	0	0	0	0	0	0	0	0	0	0	0	0	0	0	0	0	0	0	0	0	0	0	0	0	0	0	0	0	0	0	0	0	0	0	0	0	0	0	0	0	0	0	0	0
b48	0	0	0	0	AT	0	0	0	0	0	0	0	0	0	0	0	0	0	0	0	0	0	0	0	0	0	0	0	0	0	0	0	0	0	0	0	0	0	0	0	0	0	0	0	0	0	0	0	0
b49	0	0	0	0	G	0	0	0	0	0	0	0	0	0	0	0	0	0	0	0	0	0	0	0	0	0	0	0	0	0	0	0	0	0	0	0	0	0	0	0	0	0	0	0	0	0	0	0	0
b4	0	0	0	0	A	0	0	0	0	0	0	0	0	0	0	0	0	0	0	0	0	0	0	0	0	0	0	0	0	0	0	0	0	0	0	0	0	0	0	0	0	0	0	0	0	0	0	0	0
b50	0	0	0	0	AT	0	0	0	0	0	0	0	0	0	0	0	0	0	0	0	0	0	0	0	0	0	0	0	0	0	0	0	0	0	0	0	0	0	0	0	0	0	0	0	0	0	0	0	0
b5	0	0	0	0	T	0	0	0	0	0	0	0	0	0	0	0	0	0	0	0	0	0	0	0	0	0	0	0	0	0	0	0	0	0	0	0	0	0	0	0	0	0	0	0	0	0	0	0	0
b6	0	0	0	0	0	0	0	0	0	0	0	0	0	0	0	0	0	0	0	0	0	0	0	0	0	0	0	0	0	0	0	0	0	0	0	0	0	0	0	0	0	0	0	0	0	0	0	0	0
b7	0	0	0	0	AC	0	0	0	0	0	0	0	0	0	0	0	0	0	0	0	0	0	0	0	0	0	0	0	0	0	0	0	0	0	0	0	0	0	0	0	0	0	0	0	0	0	0	0	0
b8	0	0	0	0	0	0	0	0	0	0	0	0	0	0	0	0	0	0	0	0	0	0	0	0	0	0	0	0	0	0	0	0	0	0	0	0	0	0	0	0	0	0	0	0	0	0	0	0	0
b9	0	0	0	0	T	0	0	0	0	0	0	0	0	0	0	0	0	0	0	0	0	0	0	0	0	0	0	0	0	0	0	0	0	0	0	0	0	0	0	0	0	0	0	0	0	0	0	0	0
d10	0	0	T	0	AT	0	0	0	0	0	0	0	0	0	0	0	0	0	0	0	0	0	0	0	0	0	0	0	0	0	0	0	0	0	0	0	0	0	0	0	0	0	0	0	0	0	0	0	0
d11	0	0	0	0	0	0	T	0	0	0	0	0	0	0	0	0	0	0	0	0	0	0	0	0	0	0	0	0	0	0	0	G	0	C	0	0	0	0	0	A	0	0	0	0	0	0	0	0	A
d12	0	0	0	0	ATGC	0	0	0	0	0	0	0	0	0	0	0	0	0	0	0	0	0	0	0	0	0	0	0	0	0	0	G	0	C	0	0	0	0	0	0	0	0	0	0	0	0	0	0	0
d13	0	0	0	0	T	0	0	0	0	0	G	0	0	0	0	0	0	0	0	0	0	0	0	0	0	0	0	0	0	0	0	0	0	0	0	0	0	0	0	0	0	0	0	0	0	0	0	0	0
d14	0	0	0	0	TGC	0	0	0	0	0	0	0	0	0	0	0	0	0	0	0	0	0	0	0	0	0	0	0	0	0	0	A	0	C	0	0	0	0	0	0	0	0	0	0	0	0	0	0	A
d15	0	0	0	0	G	0	0	0	0	0	0	0	0	0	0	0	0	0	0	0	0	0	0	0	0	0	0	0	0	0	0	0	0	0	0	0	0	0	0	0	0	0	0	0	0	0	0	0	0
d16	0	0	0	0	AT	0	0	0	0	0	0	0	0	0	0	G	0	0	0	0	0	0	0	0	0	0	0	0	0	0	0	G	0	0	0	0	0	0	0	0	0	0	0	0	0	0	0	A	0
d17	0	0	0	0	AT	0	0	0	0	0	0	0	0	0	0	0	0	0	0	0	0	0	0	0	0	0	0	0	0	0	0	0	0	0	0	0	0	0	0	0	0	0	0	0	0	0	0	0	0
d18	0	0	0	0	T	0	0	0	0	0	0	0	0	0	0	0	0	0	0	0	0	0	0	0	0	0	0	0	0	0	0	0	0	T	0	0	0	0	0	0	0	0	0	0	0	0	0	0	0
d19	0	0	0	0	0	0	0	0	0	0	0	0	0	0	0	G	0	0	0	0	0	0	0	0	0	0	0	0	0	0	0	0	0	C	0	0	0	0	0	0	0	0	0	0	0	0	0	0	0
d1	0	0	0	0	A	0	0	0	0	0	0	0	0	0	0	0	0	0	0	0	0	0	0	0	0	0	0	0	0	0	0	0	0	T	0	0	0	0	0	0	0	0	0	0	0	0	0	0	0
d20	0	0	0	0	C	0	0	0	0	0	0	0	0	0	0	0	0	0	0	0	0	0	0	0	0	0	0	0	0	0	0	0	0	T	0	0	0	0	0	0	0	0	0	0	0	0	0	0	A
d21	0	0	0	0	0	0	0	0	0	0	0	0	0	0	0	0	0	0	T	0	0	0	0	0	0	0	0	0	0	0	0	0	0	T	0	0	0	0	0	0	0	0	0	0	0	0	0	0	0
d22	0	0	0	0	T	0	0	0	0	0	0	0	0	0	0	0	0	0	0	0	0	0	0	0	0	0	0	0	0	0	0	G	0	T	0	0	0	0	0	0	0	0	0	0	0	0	0	0	0
d23	0	0	0	0	AT	0	0	0	0	0	0	0	0	0	0	0	0	0	0	0	0	0	0	0	0	0	0	0	0	0	C	G	0	0	0	0	0	0	0	0	0	0	0	0	0	0	0	0	0
d24	0	0	0	0	A	0	0	0	0	0	0	0	0	0	0	0	0	0	C	0	0	0	0	0	0	0	0	0	0	0	0	0	0	0	0	0	0	0	0	0	0	0	0	0	0	0	0	0	0
d25	0	0	0	0	A	0	0	0	0	0	0	0	0	0	0	0	0	0	0	0	0	0	0	0	0	0	0	0	0	0	0	0	0	0	0	0	0	0	0	0	0	0	0	0	0	0	0	0	0
d26	0	0	0	0	A	0	0	0	0	0	0	0	0	0	0	0	0	0	0	0	0	0	0	0	0	0	0	0	0	0	0	0	0	0	0	0	0	0	0	0	0	0	0	0	0	0	0	0	0
d27	0	0	0	0	T	0	0	0	0	0	0	0	0	0	0	0	0	0	0	0	0	0	0	C	0	0	0	G	0	0	0	0	0	0	0	0	0	0	0	0	0	0	0	0	0	0	0	0	A
d28	0	0	0	0	A	0	0	0	0	0	0	0	0	T	0	0	0	0	0	0	0	0	0	0	0	0	0	0	0	0	0	0	0	T	0	0	0	0	0	0	0	0	0	0	0	0	0	0	0
d29	0	0	0	0	AT	0	0	0	0	0	0	0	0	0	0	T	0	0	0	0	0	0	0	0	0	0	0	0	0	0	0	G	0	0	0	0	0	0	0	T	0	0	0	0	0	0	0	0	0
d2	0	0	0	0	A	0	0	0	0	0	0	0	0	0	0	A	0	0	0	0	0	0	0	0	0	0	0	0	0	0	0	0	0	0	0	0	0	0	0	0	0	0	0	G	0	0	0	0	0
d3	0	0	0	0	AT	0	0	0	0	0	0	0	0	0	0	0	0	0	0	0	0	0	0	0	0	0	0	G	0	0	0	A	0	T	0	0	0	0	0	0	0	0	0	0	0	0	0	0	0
d4	0	0	0	0	0	0	0	0	0	0	0	0	0	0	0	0	0	0	0	0	0	0	0	0	0	0	0	0	0	0	0	0	0	0	0	0	0	0	0	0	0	0	0	0	0	0	0	0	0
d5	0	0	0	0	T	0	0	0	0	0	0	0	0	0	0	0	0	0	0	0	0	0	0	0	0	0	0	0	0	0	0	0	0	0	0	0	0	0	0	0	0	0	0	0	0	0	0	0	0
d6	0	0	0	0	0	0	0	0	0	0	0	0	0	0	0	0	0	0	0	0	0	0	0	0	0	0	0	0	0	0	0	G	0	C	0	0	0	0	0	0	0	0	0	0	0	0	0	0	A
d7	0	0	0	0	T	0	0	0	0	0	0	0	0	0	0	G	0	0	0	0	0	0	0	0	0	0	0	0	0	0	0	G	0	0	0	0	0	0	0	0	0	0	0	0	0	0	0	0	0
d8	0	0	0	0	A	0	0	0	0	0	0	0	0	0	0	0	0	0	A	0	0	0	0	0	0	0	0	0	0	0	0	0	0	0	0	0	0	0	0	AC	0	0	0	0	0	0	0	0	A
d9	0	0	0	A	0	0	0	0	0	0	0	0	0	0	0	0	0	0	0	0	0	0	0	0	0	0	0	0	0	0	0	0	0	0	0	0	0	0	0	0	0	0	0	0	0	0	0	0	0
F10	0	0	0	0	0	0	0	0	0	0	0	0	0	0	0	0	0	0	0	0	0	0	0	0	0	0	0	0	0	0	0	0	0	0	0	0	0	0	0	0	0	0	0	0	0	0	0	0	0
F11	0	0	0	0	A	0	0	0	0	0	0	0	0	0	0	0	0	0	0	0	0	0	0	0	0	0	0	0	0	0	0	0	0	0	0	0	0	0	0	0	0	0	0	0	0	0	0	T	0
F12	0	0	0	0	0	0	0	0	0	0	0	0	0	0	0	0	0	0	0	0	0	0	0	0	0	0	0	0	0	0	0	0	0	0	0	0	0	0	0	0	0	0	0	0	0	0	0	0	0
F13	0	0	0	0	A	0	0	0	0	0	0	0	0	0	0	0	0	0	0	0	0	0	0	0	0	0	0	0	0	0	0	0	0	0	0	0	0	0	0	0	0	0	0	0	0	0	0	0	0
F14	0	0	0	0	0	0	0	0	0	0	0	0	0	0	0	0	0	0	0	0	0	0	0	0	0	0	0	0	0	0	0	0	0	0	0	0	0	0	0	0	0	0	0	0	0	0	0	0	0
F15	0	0	0	0	A	0	0	0	0	0	0	0	0	0	0	0	0	0	0	0	0	0	0	G	0	0	0	0	0	0	0	0	0	0	0	0	0	0	0	0	0	0	0	0	0	0	0	0	0
F16	0	0	0	0	0	0	0	0	0	0	0	0	0	0	0	0	0	0	0	0	0	0	0	0	0	0	0	0	0	0	0	0	0	0	0	0	0	0	0	0	0	0	0	0	0	0	0	0	0
F17	0	0	0	0	T	0	0	0	0	0	0	0	0	0	0	0	0	0	0	0	0	0	0	0	0	0	0	0	0	0	0	0	0	0	0	0	0	0	0	0	0	0	0	0	0	0	0	0	0
F18	0	0	0	0	0	0	C	0	0	0	0	0	0	0	0	0	0	0	0	0	0	0	0	0	0	0	0	0	0	0	0	0	0	0	0	0	0	0	0	0	0	0	0	0	0	0	0	0	0
F19	0	0	0	0	0	0	0	0	0	0	0	0	0	0	0	0	0	0	0	0	0	0	0	0	0	0	0	0	0	0	0	0	0	0	0	0	0	0	0	0	0	0	0	0	0	0	0	0	0
F1	0	0	0	0	T	0	0	0	0	0	0	0	0	0	0	0	0	0	0	0	0	0	0	0	0	0	0	0	0	0	0	0	0	0	0	0	0	0	0	0	0	0	0	0	0	0	0	0	0
F20	0	0	0	0	TC	0	0	0	0	0	0	0	0	0	0	0	0	0	0	0	0	0	0	0	0	0	0	0	0	0	0	0	0	0	0	0	0	0	0	0	0	0	0	0	0	0	0	0	0
F21	0	0	0	0	ATC	0	0	0	0	0	0	0	0	0	0	0	0	0	0	0	0	0	0	0	0	0	0	0	0	0	0	0	0	0	0	0	0	0	0	T	0	0	0	0	0	0	0	0	0
F22	0	0	0	0	T	0	0	0	0	0	0	0	0	0	0	0	0	0	0	0	0	0	0	0	0	0	0	0	0	0	0	0	0	0	0	0	0	0	0	0	0	0	0	0	0	0	0	0	0
F23	0	0	0	0	0	0	0	0	0	0	0	0	0	0	0	0	0	0	0	0	0	0	0	0	0	0	0	0	0	0	0	0	0	0	0	0	0	0	0	0	0	0	0	0	0	0	0	0	0
F24	0	0	0	0	0	0	0	0	0	0	0	0	0	0	0	0	0	0	0	0	0	0	0	0	0	0	0	0	0	0	0	0	0	0	0	0	0	0	0	0	0	0	0	0	0	0	0	0	0
F25	0	0	0	0	AT	0	0	0	0	0	0	0	0	0	0	0	0	0	0	0	0	0	0	0	0	0	0	0	0	0	0	0	0	0	0	0	0	0	0	0	0	0	0	0	0	0	0	0	0
F26	0	0	0	0	0	0	0	0	0	0	0	0	0	0	0	0	0	0	0	0	0	0	0	0	0	0	0	0	0	0	0	0	0	0	0	0	0	0	0	0	0	0	0	0	0	0	0	0	0
F27	0	0	0	0	0	0	0	0	0	0	0	0	0	0	0	0	0	0	0	0	0	0	0	0	0	0	0	0	0	0	0	0	0	0	0	0	0	0	0	0	0	0	0	0	0	0	0	0	0
F28	0	0	0	0	0	0	0	0	0	A	0	0	0	0	0	0	0	0	0	0	0	0	0	0	0	0	0	0	0	0	0	0	0	0	0	0	0	0	0	0	0	0	0	0	0	0	0	T	0
F29	0	0	0	0	AT	0	0	0	0	0	0	0	0	0	0	0	0	0	0	0	0	0	0	0	0	0	0	0	0	0	0	0	0	0	0	0	0	0	0	0	0	0	0	0	0	0	0	0	0
F2	0	0	0	T	0	0	0	0	0	0	0	0	0	0	0	0	0	0	0	0	0	0	0	0	0	0	0	0	0	0	0	0	0	0	0	0	0	0	0	0	0	0	0	0	0	0	0	0	0
F30	0	0	0	0	G	0	0	0	0	0	0	0	0	0	0	0	0	0	0	0	0	0	0	0	0	0	0	0	0	0	0	0	0	0	0	0	0	0	0	0	0	0	0	0	0	0	0	0	0
F31	0	0	0	0	0	0	0	0	0	0	0	0	0	0	0	0	0	0	0	0	0	0	0	0	0	0	0	0	0	0	0	0	0	0	0	0	0	0	0	0	0	0	0	0	0	0	0	0	0
F32	0	0	0	0	0	0	0	0	0	0	0	0	0	0	0	0	0	0	0	0	0	0	0	0	0	0	0	0	0	0	0	0	0	0	0	0	0	0	0	0	0	0	0	0	0	0	0	0	0
F33	0	0	0	0	0	0	0	0	0	0	0	0	0	0	0	0	0	0	0	0	0	0	0	0	0	0	0	0	0	0	0	0	0	0	0	0	0	0	0	0	0	0	0	0	0	0	0	0	0
F34	0	0	0	0	0	0	0	0	0	0	0	0	0	0	0	0	0	0	0	0	0	0	0	0	0	0	0	0	0	0	0	0	0	0	0	0	0	0	0	0	0	0	0	0	0	0	0	A	0
F35	0	0	0	0	A	0	0	0	0	0	0	0	0	0	0	0	0	0	0	0	0	0	0	0	0	0	0	0	0	0	0	0	0	0	0	0	0	0	0	0	0	0	0	0	0	0	0	0	0
F36	0	0	0	0	0	0	0	0	0	0	0	0	0	0	0	0	0	0	0	0	0	0	0	0	0	0	0	0	0	0	0	0	0	0	0	0	0	0	0	0	0	0	0	0	0	0	0	0	0
F37	0	0	0	0	0	0	0	0	0	0	0	0	0	0	0	0	0	0	0	0	0	0	0	0	0	0	0	0	0	0	0	0	0	0	0	0	0	0	0	0	0	0	0	0	0	0	0	0	0
F38	0	0	0	0	T	0	0	0	0	0	0	0	0	0	0	0	0	0	0	0	0	0	0	0	0	0	0	0	0	0	0	0	0	0	0	0	0	0	0	0	0	0	0	0	0	0	0	0	0
F39	0	0	0	0	0	0	0	0	0	0	0	0	0	0	0	0	0	0	0	0	0	0	0	0	0	0	0	0	0	0	0	0	0	0	0	0	0	0	0	0	0	0	0	0	0	0	0	0	0
F3	0	0	0	0	0	0	0	0	0	0	0	0	0	0	0	0	0	0	0	0	0	0	0	0	0	0	0	0	0	0	0	0	0	0	0	0	0	0	0	0	0	0	0	0	0	0	0	0	0
F40	0	0	0	0	AC	0	0	0	0	0	0	0	0	0	0	0	0	0	0	0	0	0	0	0	0	0	0	0	0	0	0	0	0	0	0	0	0	0	0	0	0	0	0	0	0	0	0	0	0
F41	0	0	0	0	0	0	0	0	0	0	0	0	0	0	0	0	0	0	0	0	0	0	0	0	0	0	0	0	0	0	0	0	0	0	0	0	0	0	0	0	0	0	0	0	0	0	0	0	0
F42	0	0	0	0	0	0	0	0	0	0	0	0	0	0	0	0	0	0	0	0	0	0	0	0	0	0	0	0	0	0	0	0	0	0	0	0	0	0	0	0	0	0	0	0	0	0	0	0	0
F43	0	0	0	0	0	0	0	0	0	0	0	0	0	0	0	0	0	0	0	0	0	0	0	0	0	0	0	0	0	0	0	0	0	0	0	0	0	0	0	0	0	0	0	0	0	0	0	0	0
F44	0	0	0	0	G	0	0	0	0	0	0	0	0	0	0	0	0	0	0	0	0	0	0	0	0	0	0	0	0	0	0	0	0	0	0	0	0	0	0	0	0	0	0	0	0	0	0	0	0
F45	0	0	0	0	0	0	0	0	0	0	0	0	0	0	0	0	0	0	0	0	0	0	0	0	0	0	0	0	0	0	0	0	0	0	0	0	0	0	0	0	0	0	0	0	0	0	0	0	0
F46	0	0	0	0	A	0	0	0	0	0	0	0	0	0	0	0	0	0	0	0	0	0	0	0	0	0	0	0	0	0	0	0	0	0	0	0	0	0	0	0	0	0	0	0	0	0	0	0	0
F47	0	0	0	0	0	0	0	0	0	0	0	0	0	0	0	0	0	0	0	0	0	0	0	0	0	0	0	0	0	0	0	0	0	0	0	0	0	0	0	0	0	0	0	0	0	0	0	0	0
F48	0	0	0	0	T	0	0	0	0	0	0	0	0	0	0	0	0	0	0	0	0	0	0	0	0	0	0	0	0	0	0	0	0	0	0	0	0	0	0	0	0	0	0	0	0	0	0	0	0
F49	0	0	0	0	0	0	0	0	0	0	0	0	0	0	0	0	0	0	0	0	0	0	0	0	0	0	0	0	0	0	0	0	0	0	0	0	0	0	0	0	0	0	0	0	0	0	0	0	0
F4	0	0	0	0	0	0	0	0	0	0	0	0	0	0	0	0	0	0	0	0	0	0	0	0	0	0	0	0	0	0	0	0	0	0	0	0	0	0	0	0	0	0	0	0	0	0	0	0	0
F50	0	0	0	0	0	0	0	0	0	0	0	0	0	0	0	0	0	0	0	0	0	0	0	0	0	0	0	0	0	0	0	0	0	0	0	0	0	0	0	0	0	0	0	0	0	0	0	0	0
F51	0	0	0	0	0	0	G	0	0	0	0	0	0	0	0	0	0	0	0	0	0	0	0	0	0	0	0	0	0	0	0	0	0	0	0	0	0	0	0	0	0	0	0	0	0	0	0	0	0
F52	0	0	0	0	0	0	0	0	G	0	0	0	0	0	0	0	0	0	0	0	0	0	0	0	0	0	0	0	0	0	0	0	0	0	0	0	0	0	0	0	0	0	0	0	0	0	0	0	0
F53	0	0	0	0	0	0	0	0	0	0	0	0	0	0	0	0	0	0	0	0	0	0	0	0	0	0	0	0	0	0	0	0	0	0	0	0	0	0	0	0	0	0	0	0	0	0	0	0	0
F54	0	0	0	0	0	0	0	0	0	0	0	0	0	0	0	0	0	0	0	0	0	0	0	0	0	0	0	0	0	0	0	0	0	0	0	0	0	0	0	0	0	0	0	0	0	0	0	G	0
F55	0	0	0	0	A	0	0	0	0	0	0	0	0	0	0	0	0	0	0	0	0	0	0	0	0	0	0	0	0	0	0	0	0	0	0	0	0	0	0	0	0	0	0	0	0	0	0	0	0
F56	0	0	0	0	T	0	0	0	0	0	0	0	0	0	0	0	0	0	0	0	0	0	0	0	0	0	0	0	0	0	0	0	0	0	0	0	0	0	0	0	0	0	0	0	0	0	0	0	0
F57	0	0	0	0	0	0	0	0	0	0	0	0	0	0	0	0	0	0	0	0	0	0	0	0	0	0	0	0	0	0	0	0	0	0	0	0	0	0	0	0	0	0	0	0	0	0	0	0	0
F58	0	0	0	0	0	0	0	0	0	0	0	0	0	0	0	0	0	0	0	0	0	0	0	0	0	0	0	0	0	0	0	0	0	0	0	0	0	0	0	0	0	0	0	0	0	0	0	0	0
F5	0	0	0	0	0	0	0	0	0	0	0	0	0	0	0	0	0	0	0	0	0	0	0	0	0	0	0	0	0	0	0	0	0	0	0	0	0	0	0	0	0	0	0	0	0	0	0	0	0
F6	0	0	0	0	0	0	0	0	0	0	0	0	0	0	0	0	0	0	0	0	0	0	0	0	0	0	0	0	0	0	0	0	0	0	0	0	0	0	0	0	0	0	0	0	0	0	0	0	0
F7	0	0	0	0	T	0	0	0	0	0	0	0	0	0	0	0	0	0	0	0	0	0	0	0	0	0	0	0	0	0	0	0	0	0	0	0	0	0	0	0	0	0	0	0	0	0	0	0	0
F8	0	0	0	0	0	0	0	0	0	0	0	0	0	0	0	0	0	0	0	0	0	0	0	0	0	0	0	0	0	0	0	0	0	0	0	0	0	0	0	0	0	0	0	0	0	0	0	0	0
F9	0	0	0	0	A	0	0	0	0	0	0	0	0	0	0	0	0	0	0	0	0	0	0	0	0	0	0	0	0	0	0	0	0	0	0	0	0	0	0	0	0	0	0	0	0	0	0	0	0
F59	0	0	0	A	T	0	0	0	0	0	0	0	0	0	0	0	0	0	0	0	0	0	0	0	0	0	0	0	0	0	0	0	0	0	0	0	0	0	0	0	0	0	0	0	0	0	0	0	0
F60	0	0	0	0	AT	0	0	0	0	0	0	0	0	0	0	0	0	0	0	0	0	0	0	0	0	0	0	0	0	0	0	0	0	0	0	0	0	0	0	0	0	0	0	0	0	0	0	0	0
F61	0	0	0	0	AT	0	0	0	0	0	0	0	0	0	0	0	0	0	0	0	0	0	0	0	0	0	0	0	0	0	0	0	0	0	0	0	0	0	0	0	0	0	0	0	0	0	0	0	0
F62	0	0	0	0	0	0	0	0	0	0	0	0	0	0	0	0	0	0	0	0	0	0	0	0	0	0	0	0	0	0	0	0	0	0	0	0	0	0	0	0	0	0	0	0	0	0	0	0	0
F63	0	0	0	0	AT	0	0	0	0	0	0	0	0	0	0	0	0	0	0	0	0	0	0	0	0	0	0	0	0	0	0	0	0	0	0	0	0	0	0	T	0	0	0	0	0	0	0	0	0
F64	0	0	0	0	0	0	0	0	0	0	0	0	0	0	0	0	0	0	0	0	0	0	0	0	0	0	0	0	0	0	0	0	0	0	0	0	0	0	0	0	0	0	0	0	0	0	0	A	0
F65	0	0	0	0	T	0	0	0	0	0	0	0	0	0	0	0	0	0	0	0	0	0	0	0	0	0	0	0	0	0	0	0	0	0	0	0	0	0	0	T	0	0	0	0	0	0	0	0	0
F66	0	0	0	0	0	0	0	0	0	0	0	0	0	0	0	0	0	0	0	0	0	0	0	0	0	0	0	0	0	0	0	0	0	0	0	0	0	0	0	0	0	0	0	0	0	0	0	0	0
F67	0	0	0	0	0	0	C	0	0	0	0	0	0	0	0	0	0	0	0	0	0	0	0	0	0	0	0	0	0	0	0	0	0	0	0	0	0	0	0	0	0	0	0	0	0	0	0	0	0
F68	0	0	0	0	AT	0	0	0	0	0	0	0	0	0	0	0	0	0	0	0	0	0	0	0	0	0	0	0	0	0	0	0	0	0	0	0	0	0	0	0	0	0	0	0	0	0	0	0	0
F69	0	0	0	0	T	0	0	0	0	0	0	0	0	0	0	0	0	0	0	0	0	0	0	0	0	0	0	0	0	0	0	0	0	0	0	0	0	0	0	0	0	0	0	0	0	0	0	0	0
F70	0	0	0	0	0	0	0	0	0	0	0	0	0	0	0	0	0	0	0	0	0	0	0	0	0	0	0	0	0	0	0	0	0	0	0	0	0	0	0	0	0	0	0	0	0	0	0	0	0
F71	0	0	0	0	0	0	0	0	0	0	0	0	0	0	0	0	0	0	0	0	0	0	0	0	0	0	0	0	0	0	0	0	0	0	0	0	0	0	0	0	0	0	0	0	0	0	0	0	0
F72	0	0	0	0	0	0	0	0	0	0	0	0	0	0	0	0	0	0	0	0	0	0	0	0	0	0	0	0	0	0	0	0	0	0	0	0	0	0	0	0	0	0	0	0	0	0	0	0	0
F73	0	0	0	0	T	0	0	0	0	0	0	0	0	0	0	0	0	0	0	0	0	0	0	0	0	0	0	0	0	0	0	0	0	0	0	0	0	0	0	0	0	0	0	0	0	0	0	0	0
F74	0	0	0	0	0	0	0	0	0	0	0	0	0	0	0	0	0	0	0	0	0	0	0	0	0	0	0	0	0	0	0	0	0	0	0	0	0	0	0	0	0	0	0	0	0	0	0	0	0
F75	0	0	0	0	0	0	0	0	0	0	0	0	0	0	0	0	0	0	0	0	0	0	0	0	0	0	0	0	0	0	0	0	0	0	0	0	0	0	0	0	0	0	0	0	0	0	0	0	0
F76	0	0	0	0	0	0	0	0	0	0	0	0	0	0	0	0	0	0	0	0	0	0	0	0	0	0	0	0	0	0	0	0	0	0	0	0	0	0	0	0	0	0	0	0	0	0	0	0	0
F77	0	0	0	0	C	0	0	0	0	0	0	0	0	0	0	0	0	0	0	0	0	0	0	0	0	0	0	0	0	0	0	0	0	0	0	0	0	0	0	T	0	0	0	0	0	0	0	0	0
F78	0	0	0	0	0	0	0	0	0	0	0	0	0	0	0	0	0	0	0	0	0	0	0	0	0	0	0	0	0	0	0	0	0	0	0	0	0	0	0	0	0	0	0	0	0	0	0	0	0
F79	0	0	0	0	A	0	0	0	0	0	0	0	0	0	0	0	0	0	0	0	0	0	0	0	0	0	0	0	0	0	0	0	0	0	0	0	0	0	0	0	0	0	0	0	0	0	0	0	0
F80	0	0	0	0	0	0	0	0	0	0	0	0	0	0	0	0	0	0	0	0	0	0	0	0	0	0	0	0	0	0	0	0	0	0	0	0	0	0	0	0	0	0	0	0	0	0	0	0	0
lc1	0	0	0	0	0	0	0	0	0	0	0	0	0	0	0	0	0	0	0	0	0	0	0	0	0	0	0	0	0	0	0	0	0	0	0	0	0	0	0	0	0	0	0	0	0	0	0	0	0
lc5	0	0	0	0	0	0	0	0	0	0	0	0	0	0	0	0	0	0	0	0	0	0	0	0	0	0	0	0	0	0	0	0	0	0	0	0	0	0	0	0	0	0	0	0	0	0	0	AT	0
lm1	0	0	0	0	A	0	0	0	0	0	0	0	0	0	0	0	0	0	0	0	0	0	0	0	0	0	0	0	0	0	0	0	0	0	0	0	0	0	0	0	0	0	0	0	0	0	0	AT	0
lu1	0	0	0	0	0	0	0	0	0	0	0	0	0	0	0	0	0	0	0	0	0	0	0	0	0	0	0	0	0	0	0	0	0	0	0	0	0	0	0	0	0	0	0	0	0	0	0	0	0
lu3	0	0	AT	0	AT	0	0	A	0	0	0	0	0	0	0	C	0	0	0	0	0	0	0	0	0	0	0	0	0	A	0	0	0	0	0	0	0	0	0	0	0	0	0	0	0	0	0	0	0
lu4	0	0	0	0	0	0	0	0	0	T	0	0	0	0	0	0	0	0	0	0	0	0	0	0	0	0	0	0	0	0	0	0	0	0	0	0	0	0	0	0	0	0	0	0	A	0	0	0	0
st1	0	0	0	0	0	0	0	0	0	0	0	0	0	0	0	0	0	0	0	0	0	0	0	0	0	0	0	0	0	0	0	0	0	0	0	0	0	0	0	0	0	0	0	0	0	0	0	0	0
L10	0	0	0	0	AT	0	0	0	0	0	0	0	0	0	0	0	0	0	0	0	0	0	0	0	0	0	0	0	0	0	0	0	0	0	0	0	0	0	0	0	0	0	0	0	0	0	0	0	0
L11	0	0	0	0	AT	0	0	0	0	0	0	0	0	0	0	0	0	0	0	0	0	0	0	0	0	0	0	0	0	0	C	0	0	C	0	0	0	0	0	0	0	0	0	0	0	0	0	0	0
L12	0	0	0	0	A	0	0	0	0	0	0	0	0	0	0	0	0	0	0	GC	0	0	0	C	0	0	0	0	0	0	0	G	0	0	0	0	0	0	0	T	0	0	0	0	0	0	0	0	0
L13	0	0	0	0	ATGC	0	0	0	0	0	0	0	0	0	0	0	0	0	0	0	0	0	0	C	0	0	0	0	0	0	0	G	C	0	0	0	0	0	0	0	0	0	0	0	G	0	0	0	0
L14	0	0	0	0	ATC	0	0	0	0	0	0	0	0	0	0	0	0	0	0	0	0	0	0	C	0	0	0	0	0	0	C	G	0	C	0	0	0	0	0	0	0	0	0	0	0	0	0	0	0
L15	0	0	0	0	ATG	0	0	0	0	0	0	0	0	0	0	0	0	0	0	0	0	0	0	0	0	0	0	0	0	0	0	0	0	0	0	0	0	0	0	0	0	0	0	0	0	0	0	0	0
L16	0	0	0	0	ATC	0	0	0	0	0	0	0	0	0	0	0	0	0	0	0	0	0	0	0	0	0	0	0	0	0	0	G	0	0	0	0	0	0	0	0	0	0	0	0	G	0	0	0	0
L17	0	0	0	0	ATC	0	0	0	0	0	0	0	0	0	0	0	0	0	0	0	0	0	0	0	0	0	0	0	0	0	0	0	0	0	0	0	0	0	0	0	0	0	0	0	G	0	0	0	0
L18	0	0	0	0	TG	0	0	0	0	0	0	0	0	0	0	0	0	0	0	0	0	0	0	0	0	0	0	0	0	0	C	G	0	C	0	0	0	0	0	0	0	0	0	0	0	0	0	0	0
L19	0	0	0	0	AT	0	0	0	0	0	0	0	0	0	0	0	0	0	0	0	0	0	0	0	0	0	0	0	0	0	0	0	0	0	0	0	0	0	0	0	0	0	0	0	0	0	0	0	0
L1	0	0	0	0	0	0	0	0	0	0	0	0	0	0	0	0	0	0	0	0	0	0	0	0	0	0	0	0	0	0	0	A	0	0	0	0	0	0	0	AT	0	0	0	0	0	0	0	0	0
L20	0	0	0	0	T	0	0	0	0	0	0	0	0	0	0	0	0	0	0	0	0	0	0	C	0	0	0	0	0	0	C	0	0	T	0	0	0	0	0	0	0	0	0	0	0	0	0	0	0
L21	0	0	0	0	A	0	0	0	0	0	0	0	0	0	0	0	0	0	0	0	0	0	0	C	0	0	0	0	0	0	0	A	C	0	0	0	0	0	0	0	0	0	0	0	0	0	0	0	0
L2	0	0	0	0	ATGC	0	0	0	0	0	0	0	0	0	0	0	0	0	0	0	0	0	0	C	0	0	0	0	0	0	0	G	C	0	0	0	0	0	0	0	0	0	0	0	G	0	0	0	0
L3	0	0	0	0	AT	0	0	0	0	0	0	0	0	0	0	0	0	0	0	0	0	0	0	C	0	0	0	0	0	0	C	0	0	C	0	0	0	0	0	0	0	0	0	0	0	0	0	0	0
L4	0	0	0	0	T	0	0	0	0	0	0	0	0	0	0	0	0	0	0	0	0	0	0	0	0	0	0	0	0	0	0	0	0	0	0	0	0	0	0	0	0	0	0	0	0	0	0	0	0
L5	0	0	0	0	0	0	0	0	0	0	0	0	0	0	0	0	0	0	0	0	0	0	0	0	0	0	0	0	0	0	0	0	0	0	0	0	0	0	0	0	0	0	0	0	0	0	0	0	0
L6	0	0	0	0	AT	0	0	0	0	0	0	0	0	0	0	0	0	0	0	0	0	0	0	0	0	0	0	0	0	0	0	0	0	0	0	0	0	0	0	0	0	0	0	0	0	0	0	0	0
L7	0	0	0	0	T	0	0	0	0	0	0	0	0	0	0	0	0	0	0	0	0	0	0	0	0	0	0	0	0	0	0	0	0	0	0	0	0	0	0	0	0	0	0	0	0	0	0	0	0
L8	0	0	0	0	AG	0	0	0	0	0	0	0	0	0	0	0	0	0	0	0	0	0	0	C	0	0	0	0	0	0	0	G	0	0	0	0	0	0	0	0	0	0	0	0	0	0	0	0	0
L9	0	0	0	0	ATC	0	0	0	0	0	0	0	0	0	0	0	0	0	0	0	0	0	0	0	0	0	0	0	0	0	0	0	0	0	0	0	0	0	0	0	0	0	0	0	G	0	0	0	0
L22	0	0	A	0	ATG	0	0	0	0	0	0	0	0	0	0	0	0	0	0	0	0	0	0	C	0	0	0	0	0	0	0	0	0	0	0	0	0	0	0	0	0	0	0	0	0	0	0	0	0
L23	0	0	0	0	A	0	0	0	0	0	0	0	0	0	0	0	0	0	A	0	0	0	0	0	0	0	0	0	0	0	0	0	0	0	0	0	0	0	0	0	0	0	0	0	0	0	0	0	0
L24	0	0	0	0	ATG	0	0	0	0	0	0	0	0	0	0	0	0	0	0	0	0	0	0	0	0	0	0	0	0	0	C	G	0	C	0	0	0	0	0	0	0	0	0	0	G	0	0	0	A
L25	0	0	0	0	ATGC	0	0	0	0	0	0	0	0	0	0	0	0	0	0	0	0	0	0	0	0	0	0	0	0	0	0	0	0	0	0	0	0	0	0	0	0	0	0	0	0	0	0	0	0
L26	0	0	0	0	T	0	0	0	0	0	0	0	0	0	0	0	0	0	0	0	0	0	0	0	0	0	0	0	0	0	0	0	0	0	0	0	0	0	0	0	0	0	0	0	0	0	0	0	0
L27	0	0	0	0	AT	0	0	0	0	0	0	0	0	0	0	0	0	0	0	0	0	0	0	C	0	0	0	0	0	0	C	0	0	C	0	0	0	0	0	0	0	0	0	0	0	0	0	0	0
L28	0	0	0	0	AT	0	0	0	0	0	0	0	0	0	0	0	0	0	0	0	0	0	0	0	0	0	0	0	0	0	0	0	0	0	0	0	0	0	0	0	0	0	0	0	0	0	0	0	0
L29	0	0	0	0	A	0	0	0	0	0	0	0	0	0	0	0	0	0	0	0	0	0	0	C	0	0	0	0	0	0	C	0	0	0	0	0	0	0	0	0	0	0	0	0	G	0	0	0	A
L30	0	0	0	0	0	0	0	0	0	0	0	0	0	0	0	0	0	0	G	0	0	0	0	0	0	0	0	0	0	0	0	0	0	0	0	0	0	0	0	0	0	0	0	0	0	0	0	0	0
L31	0	0	0	0	ATGC	0	0	0	0	0	0	0	0	0	0	0	0	0	0	0	0	0	0	0	0	0	0	0	0	0	0	0	0	0	0	0	0	0	0	0	0	0	0	0	G	0	0	0	0
L32	0	0	0	0	TG	0	A	0	0	0	0	0	0	0	0	0	0	0	0	0	0	0	0	0	0	0	0	0	0	0	0	0	0	0	0	0	0	0	0	0	0	0	0	0	0	0	0	0	0
L33	0	0	0	0	T	0	0	0	0	0	0	0	0	0	0	0	0	0	0	0	0	0	0	C	0	0	0	0	0	0	C	0	0	C	0	0	0	0	0	0	0	0	0	0	0	0	0	0	0
L34	0	0	0	0	AT	0	0	0	0	0	0	0	0	0	0	0	0	0	0	0	0	0	0	0	0	0	0	0	0	0	0	0	0	0	0	0	0	0	0	A	0	0	0	0	0	0	0	0	0
L35	0	0	T	0	AT	0	0	0	0	0	0	0	0	0	0	0	0	0	0	0	0	0	0	C	0	0	0	0	0	0	0	0	C	0	0	0	0	0	0	0	0	0	0	0	G	0	0	0	0
L36	0	0	0	0	AT	0	0	0	0	0	0	0	0	0	0	0	0	0	G	0	0	0	0	0	0	0	0	0	0	0	0	0	0	0	0	0	0	0	0	0	0	0	0	0	0	0	0	0	0
L37	0	0	0	0	T	0	0	0	0	0	0	0	0	0	0	0	0	0	0	0	0	0	0	C	0	0	0	0	0	0	0	0	0	0	0	0	0	0	0	T	0	0	0	0	0	0	0	0	0
L38	0	0	0	0	AT	0	0	0	0	0	0	0	0	0	0	0	0	0	0	0	0	0	0	0	0	0	0	0	0	0	0	0	0	0	0	0	0	0	0	A	0	0	0	0	0	0	0	0	0
L39	0	0	0	0	AT	0	0	0	0	0	0	0	0	0	0	0	0	0	0	0	0	0	0	0	0	0	0	0	0	0	0	0	0	0	0	0	0	0	0	0	0	0	0	0	0	0	0	0	0
L40	0	0	0	0	ATGC	0	0	0	0	0	0	0	0	0	0	0	0	0	0	0	0	0	0	0	0	0	0	0	0	0	0	G	0	0	0	0	0	0	0	0	0	0	0	0	0	0	0	0	0
L41	0	0	0	0	ATGC	0	0	0	0	0	0	0	0	0	0	0	0	0	0	0	0	0	0	C	0	0	0	0	0	0	0	G	C	0	0	0	0	0	0	0	0	0	0	0	G	0	0	0	0
L42	0	0	0	0	AT	0	0	0	0	0	0	0	0	0	0	0	0	0	0	0	0	0	0	C	0	0	0	0	0	0	0	G	0	0	0	0	0	0	0	0	0	0	0	0	G	0	0	0	0
R10	0	0	0	0	A	0	0	0	0	0	0	0	0	0	0	0	0	0	0	0	0	0	0	0	0	0	0	0	0	0	0	0	0	0	0	0	0	0	0	0	0	0	0	0	0	0	0	0	0
R11	0	0	0	0	0	0	0	0	0	0	0	0	0	0	0	0	0	0	0	0	0	0	0	0	0	0	0	0	0	0	0	0	0	0	0	0	0	0	0	0	0	0	0	0	0	0	0	0	0
R12	0	0	0	0	0	0	0	0	0	0	0	0	0	0	0	0	0	0	0	0	0	0	0	0	0	0	0	0	0	0	0	0	0	0	0	0	0	0	0	0	0	0	0	0	0	0	0	0	0
R13	0	0	0	0	A	0	0	0	0	0	0	0	0	0	0	0	0	0	0	0	0	0	0	0	0	0	0	0	0	0	0	0	0	0	0	0	0	0	0	0	0	0	0	0	0	0	0	0	0
R14	0	0	0	0	0	0	0	0	0	0	0	0	0	0	0	0	0	0	0	0	0	0	0	0	0	0	0	0	0	0	0	0	0	0	0	0	0	0	0	0	0	0	0	0	0	0	0	0	0
R15	0	0	0	0	TC	0	0	0	0	0	0	0	0	0	0	0	0	0	0	0	0	0	0	0	0	0	0	0	0	0	0	0	0	0	0	0	0	0	0	0	0	0	0	0	0	0	0	0	0
R16	0	0	0	0	0	0	0	0	0	0	0	0	0	0	0	0	0	0	0	0	0	0	0	0	0	0	0	0	0	0	0	0	0	0	0	0	0	0	0	0	0	0	0	0	0	0	0	0	0
R17	0	0	0	0	0	0	0	0	0	0	0	0	0	0	0	0	0	0	0	0	0	0	0	0	0	0	0	0	0	0	0	0	0	0	0	0	0	0	0	0	0	0	0	0	0	0	0	0	0
R18	0	0	0	0	T	0	0	0	0	0	0	0	0	0	0	0	0	0	0	0	0	0	0	0	0	0	0	0	0	0	0	0	0	0	0	0	0	0	0	0	0	0	0	0	0	0	0	0	0
R19	0	0	0	0	0	0	0	0	0	0	0	0	0	0	0	0	0	0	0	0	0	0	0	0	0	0	0	0	0	0	0	0	0	0	0	0	0	0	0	0	0	0	0	0	0	0	0	0	0
R1	0	0	0	0	0	0	0	0	0	0	0	0	0	0	0	0	0	0	0	0	0	0	0	C	0	0	0	0	0	0	0	0	0	0	0	0	0	0	0	0	0	0	0	0	0	0	0	0	0
R2	0	0	0	0	0	0	0	0	0	0	0	0	0	0	0	0	0	0	G	0	0	0	0	0	0	0	0	0	0	0	0	0	0	0	0	0	0	0	0	0	0	0	0	0	0	0	0	0	0
R3	0	0	0	0	G	0	0	0	0	0	0	0	0	0	0	TGC	0	0	0	0	0	0	0	0	0	0	0	0	0	0	C	0	0	0	0	0	0	0	0	T	0	0	0	0	0	0	0	0	0
R4	0	0	0	0	0	0	0	0	0	0	0	0	0	0	0	0	0	0	0	0	0	0	0	0	0	0	0	0	0	0	0	0	0	0	0	0	0	0	0	0	0	0	0	0	0	0	0	0	0
R5	0	0	0	0	A	0	0	0	0	0	0	0	0	0	0	0	0	0	0	0	0	0	0	0	0	0	0	0	0	0	0	0	0	0	0	0	0	0	0	0	0	0	0	0	0	0	0	0	0
R6	0	0	0	0	0	0	0	0	0	0	0	0	0	0	0	0	0	0	C	0	0	0	0	0	0	0	0	0	0	0	0	0	0	0	0	0	0	0	0	AT	0	0	0	0	0	0	0	0	0
R7	0	0	0	0	0	0	0	0	0	0	0	0	0	0	0	0	0	0	0	0	0	0	0	0	0	0	0	0	0	0	0	0	0	0	0	0	0	0	0	0	0	0	0	0	0	0	0	0	0
R8	0	0	0	0	T	0	0	0	0	0	0	0	G	0	0	0	0	0	0	0	0	0	0	0	0	0	0	0	0	0	0	0	0	0	0	0	0	0	0	0	0	0	0	0	0	0	0	0	0
R9	0	0	0	0	0	0	0	0	0	0	0	0	0	0	0	0	0	0	0	0	0	0	0	0	0	0	0	0	0	0	0	0	0	0	0	0	0	0	0	0	0	0	0	0	0	0	0	0	0
x10	0	0	0	0	0	0	0	0	0	0	0	0	0	0	0	0	0	0	0	0	0	0	0	0	0	0	0	0	0	0	0	0	0	0	0	0	0	0	0	0	0	0	0	0	0	0	0	0	0
x11	0	0	0	0	0	0	0	0	0	0	0	0	0	0	0	0	0	0	0	0	0	0	0	0	0	0	0	0	0	0	0	0	0	0	0	0	0	0	0	0	0	0	0	0	0	0	0	0	0
x12	0	0	0	0	0	0	0	0	0	0	0	0	0	0	0	0	0	0	0	0	0	0	0	0	0	0	0	0	0	0	0	0	0	0	0	0	0	0	0	0	0	0	0	0	0	0	0	0	0
x13	0	0	0	0	ATC	0	0	0	0	0	0	0	0	0	0	0	0	0	0	0	0	0	0	0	0	0	0	0	0	0	0	0	0	0	0	0	0	0	0	0	0	0	0	0	0	0	0	0	0
x14	0	0	0	0	T	0	0	0	0	0	0	0	0	0	0	0	0	0	0	0	0	0	0	0	0	0	0	0	0	0	0	0	0	0	0	0	0	0	0	0	0	0	0	0	0	0	0	0	0
x15	0	0	0	0	AT	0	C	0	0	0	0	0	0	0	0	0	0	0	0	0	0	0	0	0	0	0	0	0	0	0	0	0	0	0	0	0	0	0	0	0	0	0	0	0	0	0	0	0	0
x16	0	0	0	0	0	0	A	0	0	0	0	0	0	0	0	0	0	0	0	0	0	0	0	0	0	0	0	0	0	0	0	0	0	0	0	0	0	0	0	0	0	0	0	0	A	0	0	0	0
x17	0	0	0	0	AT	0	0	0	0	0	0	0	0	0	0	0	0	0	0	0	0	0	0	0	0	0	0	0	0	0	0	0	0	0	0	0	0	0	0	0	0	0	0	0	0	0	0	0	0
x18	0	0	0	0	T	0	0	0	0	0	0	0	0	0	0	0	0	0	0	0	0	0	0	0	0	0	0	0	0	0	0	0	0	0	0	0	0	0	0	0	0	0	0	0	0	0	0	0	0
x19	0	0	0	0	0	0	0	0	0	0	0	0	0	0	0	0	0	0	0	0	0	0	0	0	0	0	0	0	0	0	0	0	0	0	0	0	0	0	0	0	0	0	0	0	0	0	0	T	0
x1	0	0	0	0	ATG	0	0	0	0	0	0	0	0	0	0	C	0	0	0	0	0	0	G	0	0	0	0	0	0	0	0	0	0	0	0	0	0	0	0	A	0	0	0	0	A	0	0	0	A
x20	0	0	0	0	0	0	0	0	0	0	0	0	0	0	0	0	0	0	0	0	0	0	0	0	0	0	0	0	0	0	0	0	0	0	0	0	0	0	0	0	0	0	0	0	0	0	0	0	0
x21	0	0	0	0	0	0	0	0	0	0	0	0	0	0	0	0	0	0	0	0	0	0	0	0	0	0	0	0	0	0	0	0	0	0	0	0	0	0	0	0	0	0	0	0	0	0	0	0	0
x22	0	0	0	0	T	0	0	0	0	0	0	0	0	0	0	0	0	0	0	0	0	0	0	0	0	0	0	0	0	0	0	0	0	0	0	0	0	0	0	0	0	0	0	0	0	0	0	0	0
x2	0	0	0	0	A	0	0	0	0	0	0	0	0	0	0	0	0	0	A	0	0	0	0	0	0	0	0	0	0	0	0	0	0	0	0	0	0	0	0	T	0	0	0	0	0	0	0	0	0
x3	0	0	0	0	A	0	0	0	0	0	0	0	0	0	0	0	0	0	0	0	0	0	0	0	0	0	0	0	0	0	0	0	0	0	0	0	0	0	0	0	0	0	0	0	0	0	0	0	0
x4	0	0	0	0	0	0	C	0	0	0	0	0	0	0	0	0	0	0	0	0	0	0	0	0	0	0	0	0	0	0	0	0	0	T	0	0	0	0	0	0	0	0	0	0	0	0	0	0	0
x5	0	0	0	0	0	0	0	0	0	G	0	0	0	0	0	0	0	0	0	C	0	0	0	0	0	0	0	0	0	0	0	0	0	0	0	0	0	0	0	0	0	0	0	0	0	0	0	0	A
x6	0	0	0	0	0	0	0	0	0	0	0	0	0	0	0	0	0	0	0	0	0	0	0	0	0	0	0	0	0	0	0	0	0	0	0	0	0	0	0	0	0	0	0	0	0	0	0	0	0
x7	0	0	0	0	T	0	0	0	0	0	0	0	0	0	0	0	0	0	0	0	0	0	0	0	0	0	0	0	0	0	0	0	0	0	0	0	0	0	0	0	0	0	0	0	0	0	0	0	0
x8	0	0	0	0	0	0	0	0	0	0	0	0	0	0	0	0	0	0	0	0	0	0	0	0	0	0	0	0	0	0	0	0	0	0	0	0	0	0	0	0	0	0	0	0	0	0	0	0	0
x9	0	0	0	0	0	0	0	0	0	0	0	0	0	0	0	0	0	0	0	0	0	0	0	0	0	0	0	0	0	0	0	0	0	0	0	0	0	0	0	0	0	0	0	0	0	0	0	0	0
[truncated: 413 more columns]
